1 **TLR3 Deficiency Leads to Altered Immune Responses to *Chlamydia trachomatis***  
2 **Infection in Human Oviduct Epithelial Cells**

3 Jerry Z. Xu<sup>1¶</sup>, Ramesh Kumar<sup>1¶</sup>, Haoli Gong<sup>2</sup>, Luyao Liu<sup>2</sup>, Nicole Ramos-Solis<sup>1</sup>, Yujing  
4 Li<sup>3</sup>, and Wilbert A. Derbigny<sup>1\*</sup>

5

6 <sup>1</sup>Department of Microbiology and Immunology; Indiana University School of Medicine,  
7 Indianapolis, Indiana, United States of America.

8

9 <sup>3</sup>Department of Medical and Molecular Genetics, Indiana University School of Medicine,  
10 Indianapolis, Indiana, United States of America.

11

12 <sup>2</sup>Xiangya Second Hospital, Central South University, Peoples Republic of China.

13

14 <sup>¶</sup>These authors contributed equally to this work.

15

16 \*Corresponding author:

17 Email: [wderbign@iupui.edu](mailto:wderbign@iupui.edu)

18

19 Running Title: TLR3 deficiency in human *Chlamydia* infection

20

21

22

23 **ABSTRACT**

24 Reproductive tract pathology caused by *Chlamydia trachomatis* infection is an important  
25 global cause of human infertility. To better understand the mechanisms associated with  
26 *Chlamydia*-induced genital tract pathogenesis in humans, we used CRISPR genome  
27 editing to disrupt TLR3 function in the human oviduct epithelial (hOE) cell-line OE-  
28 E6/E7, in order to investigate the possible role(s) of TLR3 signaling in the immune  
29 response to *Chlamydia*. Disruption of TLR3 function in these cells significantly  
30 diminished the *Chlamydia*-induced synthesis of several inflammation biomarkers  
31 including IFN- $\beta$ , IL-6, IL-6Ra, sIL-6R $\beta$  (gp130), IL-8, IL-20, IL-26, IL-34, sTNF-R1,  
32 TNFSF13B, MMP-1, MMP-2, and MMP-3. In contrast, the *Chlamydia*-induced synthesis  
33 of CCL-5, IL-29 (IFN $\lambda$ 1) and IL-28A (IFN $\lambda$ 2) were significantly *increased* in the TLR3-  
34 deficient hOE cells when compared to their wild-type counterparts. Our results propose  
35 a role for TLR3 signaling in limiting the genital tract fibrosis, scarring, and chronic  
36 inflammation often associated with human chlamydial disease. Interestingly, we saw  
37 that *Chlamydia* infection induced the production of biomarkers associated with  
38 persistence, tumor metastasis, and autoimmunity such as soluble CD163 (sCD163),  
39 chitinase-3-like protein 1, osteopontin, and pentraxin-3 in the hOE cells; however, their  
40 expression levels were significantly dysregulated in the TLR3-deficient hOE cells.  
41 Finally, we demonstrate using the hOE cells that TLR3 deficiency resulted in an  
42 increased amount of chlamydial LPS within the *Chlamydia* inclusion, which is  
43 suggestive that TLR3 deficiency leads to enhanced chlamydial replication and possibly  
44 increased genital tract pathogenesis during human infection.

45

46 **KEYWORDS:** *Chlamydia trachomatis*, TLR3, human oviduct epithelial cells.

47 Abbreviations: hOE, human OE-E6/E7 cells; TLR3 KO, TLR3 knockout cell line; poly

48 (I:C), Polyinosinic–polycytidylic acid sodium salt.

49

50

51

52

## 53 **Introduction**

54 The bacterial pathogen *Chlamydia trachomatis* has caused 1,526,658 infections in the  
55 United States in 2015 (an increase of 6% since 2014), and it is the most commonly  
56 reported bacterial sexually transmitted disease (STD) in the United States (1). Genital  
57 tract *C. trachomatis* infections are easily cured with antibiotics if properly diagnosed at  
58 early stages of infection. However, because 75-90% of women infected with *Chlamydia*  
59 are asymptomatic for clinical disease, opportunities for therapeutic interventions are  
60 usually missed. The asymptomatic nature of the clinical symptoms is the major  
61 contributing factor to the continuing spread of the disease to uninfected partners, and  
62 the more severe pathogenesis and sequelae that often lead to infertility in women.  
63 Further contributing to the growing rates of infectivity amongst the previously uninfected  
64 populations are the statistics showing that up to 90% of men infected with *Chlamydia*  
65 exhibit no symptoms (2, 3) and that an effective vaccine remains elusive (4).

66 *Chlamydia* infections are also leading causes of pelvic inflammatory disease (5),  
67 tubal occlusion (6), and ectopic pregnancy (7, 8) in women. Interactions between the  
68 host immunity and *Chlamydia* infection are thought to be largely responsible for the  
69 pathology associated with human chlamydial disease, though the precise pathogenic  
70 mechanisms remain unclear (9, 10). As an obligate intracellular pathogen, *Chlamydia*  
71 species are known to interact with host-cell pattern recognition receptors (PRRs),  
72 including a variety of intracellular cytosolic receptors and Toll-like receptors (TLRs), to  
73 trigger the innate-immune inflammatory response (11-18). Stimulation of genital tract  
74 epithelial cell TLRs (and other PRRs) by chlamydial pathogen-associated molecular  
75 patterns (PAMPs) trigger cytokine responses that are critical to the establishment of

76 innate and adaptive immunity. These *Chlamydia*-induced cytokine responses also  
77 include the syntheses of inflammatory mediators that have been implicated as the major  
78 culprit in the pathology associated with *Chlamydia* disease (12, 14, 19-24). The overall  
79 goal of these investigations into the interactions between host-cell PRRs and *Chlamydia*  
80 infection is to identify the PRRs that trigger specific inflammatory mediators that cause  
81 scarring and fibrosis, and then define therapeutic measures to prevent that process.

82 Human genital tract epithelial cells express most of the known TLRs; however,  
83 the TLRs are known to vary in their expression levels within the female reproductive  
84 tract (depending upon the concentration of specific sex hormones) and their tissue  
85 distribution (25). The human Fallopian-derived epithelial cell line OE-E6/E7 (26) was  
86 shown to express functional proteins for TLRs 1 through 6, of which TLR2 was shown to  
87 have a role in the innate-immune response to *C. trachomatis* infection (27, 28). TLR2  
88 has also been shown to have a role in the immune responses to *C. muridarum* infection  
89 in mice, and that it had a significant role in the *Chlamydia*-induced genital tract  
90 pathology observed in the infected animals (12, 29-31). In our early investigations into  
91 the role of TLR3 in the immune response to genital tract *Chlamydia* infection, we  
92 showed that *C. muridarum* infected murine oviduct epithelial (OE) cells secrete IFN- $\beta$  in  
93 a mostly TLR3 dependent manner, and that mouse OE cells deficient in TLR3 show  
94 dramatic reductions in the synthesis of other inflammatory immune mediators in addition  
95 to IFN- $\beta$  (13, 15). Our most recent report shows that TLR3-deficient mice have  
96 increased chlamydial loads, aberrant genital tract secretion levels of several different  
97 inflammatory mediators, an altered CD4<sup>+</sup> T-cell recruitment, and more severe oviduct  
98 and uterine horn pathology when compared to wild-type controls (32). Our data propose

99 a protective role for TLR3 signaling in the immune response to *Chlamydia* infection in  
100 mice. However, the role of TLR3 in the immune response to *Chlamydia* infection in  
101 human oviduct tissue has not yet been investigated and remains unclear. In this study,  
102 we used the immortalized human oviduct epithelial cell line OE-E6/E7 to assess the role  
103 of TLR3 in the immune responses to *Chlamydia trachomatis* L2 infection.

104

## 105 **MATERIALS AND METHODS**

### 106 **Cell culture**

107 Human OE-E6/E7 (hOE) cells and Hela cells were maintained in high glucose  
108 Dulbecco's modified Eagle's medium (Life Technologies, Inc.) supplemented with 10%  
109 bovine calf serum (Hyclone) in a 37 °C, 5% CO<sub>2</sub> incubator. The hOE cells were  
110 originally derived from Fallopian tube tissue and were immortalized by expressing the  
111 HPV 16 E6/E7 open reading frame in a retroviral expression system (26).

112

### 113 **Reagents**

114 The following TLR agonists were purchased from InVivoGen (San Diego, CA): 1)  
115 peptidoglycan from *E. coli* serotype 0111:B4 (125 EU/mg); 2) ultrapure flagellin purified  
116 from isolated from *Bacillus subtilis* (>95% purity); and 3) ODN 2216, a synthetic  
117 oligonucleotide (ODN) that preferentially binds human TLR9 and ODN2243, an ODN  
118 2216 control without CpGs. Wildtype (WT) and TLR3-deficient hOE cells were grown to  
119 confluence in 24-well before being treated with the appropriate TLR ligand at the

120 concentrations specified in the text. Supernatants were harvested at the 24h post-  
121 treatment time point and analyzed for cytokine content using ELISA for IL-6 (R&D  
122 Systems; Minneapolis, MN) according to the manufacturer's protocol

123

#### 124 **Generating the TLR3-deficient human epithelial cell lines**

125 The human OE-E6/E7 cells and Hela cells were grown to 60-70% confluence before  
126 being transduced with either the human TLR3 CRISPR knockout Lentivirus or the  
127 CRISPR-Lenti non-targeting control transduction particles and 4µg/µL Polybrene. The  
128 Lenti-CRISPR Transduction particles (pLV-U6g-EPCG-TLR3), All-in-one ready-to-use  
129 Cas9 and guide RNA (gRNA), and CRISPR negative controls were purchased from  
130 Sigma (Sigma-Aldrich; St Louis, MO). The CRISPR system consisted of 3 gRNA  
131 sequences (CCACCTGAAGTTGACTCAGGTA, CCAACTTCACAAGGTATAGCCA, and  
132 CAGGGTGTTCACGCAATTGG), which targeted the human TLR3 gene  
133 (NM\_003265) at exon 2, exon 2, and exon 4 respectively. The CRISPR Universal  
134 negative control targets no known human, mouse, or rat gene. The transduced human  
135 OE-E6/E7 cells and Hela cells were subjected to 5µg/mL puromycin selection, and the  
136 puromycin-resistant cells were sorted by using BD FACSAria cell sorter. The brightest  
137 GFP positive cells were collected and cultured for further single-cell cloning by glass  
138 cloning cylinders. Individual cell colonies were isolated and expanded. Higher GFP  
139 expressing cell clones were further selected by using BD Accuri C6 flow cytometer.  
140 Confirmation of TLR3 gene deletion, protein expression, and receptor function was  
141 assessed using PCR, western blot, and ELISA, respectively.

142

### 143 **Genomic DNA purification and PCR-amplification**

144 Genomic DNA (gDNA) from hOE-TLRKO was purified by using the PureLink Genomic  
145 DNA Mini Kit from Invitrogen (Invitrogen Catlog# K1820-01). The gene-specific primer  
146 pairs (forward 5'-ACA AGG AAT ATA CCA ATG CAT TTG-3'and reverse 5'-GAT ATT  
147 TAG ATA GTA AGT CTA AGG-3') were designed approximate 300 bps Up-and Down  
148 streams of the gRNA (CCACCTGAAGTTGACTCAGGTA) sequence spanning exon-2 of  
149 TLR3 gene. The purified g-DNA as a template and Platinum Super-Fi PCR master mix  
150 (Invitrogen Catlog# 12358-010) were used to amplify the PCR product (599bps). The  
151 cycling conditions were as: initial denaturation at 95°C for 2 min followed by 32 cycles,  
152 denaturation at 95°C for 45 s, annealing at 50.5°C for 45 s, elongation at 72°C for 45 s  
153 and final elongation at 72°C for 2 min. The amplified PCR products were gel purified  
154 using the QIAquick gel extraction kit (Qiagen; Germantown, MD). The PCR product  
155 from hOE-WT cells was used as control sample throughout this experiment. A portion of  
156 the amplified PCR products was sent for sequencing at the IUSM Bioinformatics Core  
157 Sequencing Facility, while the rest of the PCR products were used in the cloning  
158 experiment.

159

### 160 **Cloning and Plasmid Purification**

161 An additional adenine-overhang was added to the portion of the PCR product to be  
162 cloned by using hi-fidelity Taq-polymerase and dATP at 70°C for 20min. The reaction  
163 mixtures were then ligated into pGEM-T Easy vector (Promega Catlog#A1360)



164 overnight at 4°C and then transformed into TOP10 competent *E. coli*. The transformed  
165 *E. coli* were plated on LB-agar plates containing ampicillin (60ug/ml) supplemented with  
166 IPTG. The blue and white colonies were screened and inoculated into 5ml LB medium  
167 containing Amp (final concentration 60ug/ml). The putative positive cultures were used  
168 for plasmid purification by using QiaSpin Miniprep Kit (Catlog# 27106), and inserts were  
169 confirmed by PCR before plasmid sequencing.

170

### 171 ***Chlamydia trachomatis* preparation**

172 The *C. trachomatis* L2-434/Bu (L2) and *C. trachomatis* UW-3CX serovar D strains were  
173 generously provided by Dr. David E. Nelson. The *C. trachomatis*-serovar D and L2  
174 mother pools used in these experiments were subsequently grown and titrated as  
175 described in (33), whereby antibody specific for chlamydial LPS was used to identify  
176 chlamydial inclusions in the infected Hela cells. Alexa Fluor 488 and Alexa Fluor 594  
177 anti-mouse IgG antibodies used in these experiments were purchased from Invitrogen  
178 (Invitrogen/Life Technologies; Carlsbad, CA), and immuno-staining results for titration of  
179 infectious chlamydial elementary bodies (EBs) were scanned and recorded by EVOS FL  
180 auto cell imaging system (Thermo-Fisher, Pittsburgh, PA). The corresponding isotype  
181 controls were used as negative controls.

182

### 183 **hOE and Hela cell Infections**

184 OE-E6/E7 and Hela cells were plated in either 12 or 6-well tissue culture plates and  
185 grown to 80-90% confluence. For all experiments (unless stated otherwise), the cells

186 were infected with 10 inclusion-forming-units (IFU) of *C. trachomatis* cell in cell culture  
187 medium. Immediately after adding *Chlamydia*, the tissue culture plates were gently  
188 agitated, centrifuged at 1200 rpm (200 × g) in a table-top centrifuge for 1 hour, and then  
189 incubated at 37°C in a 5% CO<sub>2</sub> humidified incubator without subsequent change of  
190 medium until the time of cell harvest. Mock-infected control cells received an equivalent  
191 volume of epithelial cell culture medium but lacked any viable *C. trachomatis*.

192

### 193 **Protein extraction and evaluating protein expression levels**

194 Epithelial cell lysates were prepared via incubation of PBS washed cell monolayers in  
195 RIPA buffer (EMD Millipore; Burlington, Massachusetts) with the addition of 1mM PMSF  
196 and 1x Protease Inhibitor Cocktails (Sigma). The total protein concentration of each  
197 sample was determined by using the Pierce BCA protein assay (Thermo Scientific).  
198 Analyses of protein expression were performed by using the WES™ simple western  
199 system (ProteinSimple; San Jose, California). Endogenous TLR3 protein expression in  
200 the wild type (WT) and CRISPR-modified epithelial cells was detected using a 1:50  
201 dilution of TLR3 monoclonal antibody (Abcam; Cambridge, MA). Relative TLR3 protein  
202 expression levels between WT and CRISPR modified cells were obtained by measuring  
203 TLR3's expression against the intracellular β-Actin control protein bound to an anti-β-  
204 Actin monoclonal antibody (1:300; Sigma). Protein detection in WES was accomplished  
205 according to the manufacturer's protocol using streptavidin-HRP based methodology  
206 (ProteinSimple). The positive control for testing antibody specificity for TLR3 expression  
207 included loading (in separate reactions) either 50ng or 100ng of HEK293 cell lysate  
208 overexpressing human TLR3 (Novus).

209

## 210 **RNA purification and real-time quantitative PCR (RT-qPCR)**

211 Total cell RNA was isolated from mock and *C. trachomatis*-infected WT and TLR3-  
212 deficient epithelial cells using the RNeasy kit plus (Qiagen, Valencia, CA). The DNA-  
213 free RNA was quantified using the NanoDrop spectrophotometer (Thermo Scientific),  
214 and cDNA was obtained with the Applied Biosystem's high-capacity cDNA reverse  
215 transcription kit (Thermo Fisher). Target mRNA was quantified using Applied  
216 Biosystem's TaqMan gene-expression master kit in reactions containing either human  
217 TLR3 primers, human IFN- $\beta$  primers, and/or  $\beta$ -actin control primers. Quantitative  
218 measurements were performed via the ABI7500 real-time PCR detection system  
219 (Thermo Fisher).

220

## 221 **Standard and Multiplex ELISA analyses**

222 The human IFN- $\beta$  ELISA Kit (cat. #41410-1) and IL-6 ELISA kit (cat. #D6050)  
223 purchased from R&D systems were used to measure the *Chlamydia*-induced IFN- $\beta$  and  
224 IL-6 respectively, using the manufacturer's protocol. The standard ELISA kits were  
225 used to measure single cytokines secreted into the supernatants of hOE-WT, hOE- N-  
226 Ctrl, and hOE-TLRKO- cells that were either mock treated, infected with *C. trachomatis*,  
227 or treated with various TLR agonist.

228 To measure the chlamydial induced syntheses of several immune factors  
229 simultaneously, WT and TLR3 deficient hOE cells were either mock treated or infected  
230 at a MOI of 10 IFU/ cell with either serovar D or the L2 strain of *C. trachomatis*. For *C.*

231 *trachomatis*-L2 infections, the supernatants were harvested at 0 (mock), 6, 12, 18, 24,  
232 and 30hrs post infection. The supernatants from the L2 infections were subjected to  
233 multiplex ELISA analyses in triplicate setting using the Bio-Plex Pro human  
234 inflammation panel-1, 37-Plex #171AL001M (Bio-Rad; Hercules, California) according  
235 to the manufacturer's instructions. For infections with *C. trachomatis*-serovar D, the  
236 supernatants were harvested at 0 (mock), 6, 12, 24, 36, 48, 60, and 72hrs post  
237 infection. The supernatants from the serovar D infections were subjected to multiplex  
238 ELISA analyses in triplicate setting using a custom designed 27-plex human magnetic  
239 Luminex assay #LXSAHM (R&D Systems) according to the manufacturer's instructions.  
240 Analyses of the data were performed in concert with the Indiana University Multiplex  
241 Analysis Core located in the Melvin and Bren Simon Cancer Center.

242

### 243 **RNA-interference**

244 The transfections of the TLR3-specific siRNA (cat. #AM16708; Ambion/ Thermo-Fisher)  
245 and the scrambled control RNA (Silencer™ negative control; Thermo-Fisher) were done  
246 using Lipofectamine RNAiMAX (Thermo-Fisher) as described in (34). Briefly, 75-80%  
247 confluent hOE-WT cells were transfected with 2.5ug of each siRNA for 24 hours at 37°C  
248 with 5% CO<sub>2</sub>. After the 24h period, cell supernatants were replaced with fresh media  
249 prior to being infected with 10 IFU/cell *C. trachomatis*-L2. The level of IFN-β expression  
250 was determined at the specified time post infection by ELISA as described above.

251

### 252 **Flow cytometric analysis and multi-spectral imaging flow cytometry**

253 WT and TLR3 deficient epithelial cells were either mock treated or infected at a MOI of  
254 10 IFU/ cell with *Chlamydia trachomatis* L2 for 24 hours. At the 24hr time point,  
255 monolayers were washed once with PBS/2mM EDTA before being gently removed from  
256 the plate with trypsin-versene, washed 3 times in ice-cold PBS/EDTA, and cell pellets  
257 resuspended in 4% Formalin for 30 min at room temperature. The cells were washed 3  
258 times with PBS/ EDTA and were permeabilized in 0.3% Triton X-100/ PBS/EDTA for 5  
259 min at room temperature. The cells were blocked in blocking buffer (5%  
260 FBS/0.1%BSA/0.1%Triton X-100/PBS/EDTA) at room temperature for 60min. The cells  
261 were stained with anti-chlamydia LPS antibody (from Dr. David E. Nelson) in blocking  
262 buffer (1:5) for 60 min at room temperature. The cells were washed 3 times with  
263 PBS/EDTA. The cells were further stained with secondary antibody APC anti-mouse  
264 IgG(H+L) (1:1000, ThermoFisher) in blocking buffer for 30min before being washed 3  
265 times with PBS/EDTA. Finally, the cells were suspended in 0.6ml 2% FBS/PBS/EDTA  
266 for flow cytometry analysis. Cellular responses to *Chlamydia* infection were analyzed via  
267 BD LSRFortessa cell analyzer (Becton Dickinson; Franklin Lakes, NJ) or by Multi-  
268 spectral Imaging Flow Cytometer Amnis Image StreamX MKII (EMD Millipore). Data  
269 were interpreted by using FlowJo v10 (FlowJo, LLC) and IDEAS (EMD Millipore)  
270 software.

271

## 272 **Immunofluorescent Staining**

273 WT and TLR3 deficient hOE cells were seeded in 96-well μ-plate (Ibidi; Fitchburg, WI)  
274 and allowed to grow to 90% confluence before being either mock treated or infected at a  
275 MOI of 5 IFU/ cell with *C. trachomatis*-serovar D. At 36 hours post infection, the

276 infected cells were then fixed with 200  $\mu$ l of methanol and incubate at room temperature  
277 for 10 minutes. The fixed cells were stained with a 1:100 dilution of anti-chlamydial LPS  
278 antibody (EVI-HI; provided to us by Dr. David E. Nelson) and incubated for 1 hour at  
279 room temperature. The stained cells were washed 3 times with PBS. Detection was  
280 accomplished with a secondary stain of Alexa Fluor 488 and Alexa Fluor 594 anti-  
281 mouse IgG antibodies (Invitrogen). Nuclei were counterstained with 4,6-diamidino-2-  
282 phenylindole (DAPI; Life Technologies) according to manufacturer's protocol and  
283 imaged at 60X under oil immersion using a Nikon Eclipse Ti microscope.

284

## 285 **Statistical Analysis**

286 Numerical data are presented as means  $\pm$  SEM. All experiments were repeated at least  
287 three times, and statistical significance was determined using either 2-way ANOVA  
288 analyses in GraphPad Prism or Student's two-tailed *t*-test. Statistically significant  
289 differences are shown by asterisks (\*) and with the minimum criteria being  $p < 0.05$ .

290

## 291 **RESULTS**

### 292 **IFN- $\beta$ is induced in human OE-E6/7 cells in response to *Chlamydia* infection**

293 IFN- $\beta$  is known to be expressed during activation of the TLR3 signaling pathway during  
294 certain viral infections, and by stimulation via the synthetic double-stranded RNA analog  
295 poly (I:C) (35, 36). To confirm the presence of TLR3 and ascertain its function in the  
296 human OE-E6/E7 cells (hOE), the hOE cells were incubated in cell culture media

297 supplemented with increasing concentrations of poly (I:C) for 24hrs. Figure 1A shows  
298 that the relative IFN- $\beta$  mRNA expression was increased at the concentrations of 25, 50,  
299 and 100  $\mu\text{g}/\text{mL}$  when compared to untreated controls. These results confirm that the  
300 TLR3 is functional in the hOE cells by demonstrating a dose-dependent increase in IFN-  
301  $\beta$  gene expression in response to poly (I:C) stimulation. To ascertain the impact of  
302 *Chlamydia* infection on IFN- $\beta$  synthesis in the hOE cells, we next infected hOE cells  
303 with *Chlamydia trachomatis* L2 at a MOI of 10 IFU/ cell for 24hrs, and measured the  
304 mRNA expression levels of both IFN- $\beta$  and TLR3. As shown in Figures 1B and 1C,  
305 mRNA expression levels of IFN- $\beta$  and TLR3 were increased during *Chlamydia* infection.  
306 These data are suggestive that *Chlamydia* infection of the hOE cells induces IFN- $\beta$   
307 synthesis and upregulates TLR3 gene expression in human oviduct tissue in a similar  
308 manner to what we have observed in the murine oviduct epithelial cells (14, 24). These  
309 findings provide the impetus for us to extrapolate that the IFN- $\beta$  induced during  
310 *Chlamydia* infection in hOE cells will also occur via TLR3-dependent mechanisms  
311 similar to what we have reported in the murine OE cells (13).

312

### 313 **Disruption of TLR3 function in human genital tract epithelial cells and clone** 314 **identification**

315 To ascertain the role of TLR3 in the innate-immune response to human genital tract  
316 *Chlamydia* infections *in vitro*, we disrupted TLR3 function in both human oviduct (hOE  
317 cells) and cervical (Hela cells) tissue using the Sigma CRISPR Lentivirus system (see  
318 Materials and Methods). The CRISPR system consisted of 3 gRNA sequences which  
319 targeted human TLR3 gene at exon 2, exon 2, and exon 4 respectively (Fig. S1). To

320 ascertain the efficacy of using this approach to disrupt TLR3 function in these cells, we  
321 first examined the TLR3 protein expression levels in the putative clones by using  
322 capillary electrophoresis in the Wes™ system to identify and quantitate TLR3 protein. In  
323 these experiments, we loaded a total 400ng of cell lysate isolated from each of the  
324 selected clones and the WT control cells. Figure 2 shows the results of capillary  
325 electrophoresis in which we simultaneously immunoassayed for both TLR3 expression  
326 and the  $\beta$ -Actin loading control in hOE cells, Hela cells, and the representative TLR3-  
327 deficient clones generated in each parental cell-line. As shown, a major band indicative  
328 of the TLR3 protein expression was identified in the hOE and Hela cells, with a peak  
329 molecular weight of 174kDa and 187kDa, respectively. Our data are suggestive that the  
330 TLR3 protein is post-translationally modified in different ways in the different cell types,  
331 which affects their electrophoretic migration and apparent molecular weight (37).

332 A qualitative examination of Figure 2 shows that TLR3 protein expression levels  
333 were substantially lower in both clone #8 of the hOE-TLR3KO cells and clone #16 of the  
334 Hela TLR3KO cells when compared to their wild-type counterparts. These clones were  
335 selected and used as TLR3-deficient versions of the human OE-E6/7 cells and the Hela  
336 cells, respectively, and were quantitatively analyzed for actual TLR3 expression levels  
337 in the Wes™ Compass software. To ascertain the actual level of reduction in TLR3  
338 protein expression levels, the protein band peaks were identified and quantified using  
339 the chemiluminescence peak area of the Wes™ generated data. The ratio of TLR3  
340 protein expression compared to that of the  $\beta$ -Actin loading control was used as the  
341 index for calculating relative TLR3 protein expression level. In the hOE cells, the ratios  
342 of TLR3/ $\beta$ -Actin for WT and TLR3KO were  $5732/41538=0.138$  and  $347/16533=0.021$ ,



343 respectively. When calculated, the TLR3 protein expression was down about 85% in  
344 clone #8 of the hOE-TLR3KO cells. In HeLa cells, the ratio of TLR3/ $\beta$ -Actin for WT and  
345 TLR3KO was  $9254/43601=0.212$  and  $310/16482=0.018$ , respectively. The calculated  
346 expression level of TLR3 protein was down about 94% in clone #16 of the HeLa  
347 TLR3KO cells. Collectively, our findings demonstrate that CRISPR Lentivirus system  
348 was very effective in disrupting TLR3 protein expression in both of these cell types.

349

350 **TLR3 deficiency in human genital tract epithelial cells results in a decreased IFN-**  
351  **$\beta$  synthesis in response to poly (I:C) stimulation and chlamydial infection.**

352 To determine whether the TLR3-deficient clones representing human oviduct and  
353 cervical tissue were also deficient in their ability to elicit appropriate TLR3-dependent  
354 innate-immune responses, we first treated the clone representative of each cell type  
355 with 0, 25, 50, 100  $\mu\text{g}/\text{mL}$  the TLR3 agonist poly (I:C) for 24hrs and assessed TLR3's  
356 functionality by measuring the induction of IFN- $\beta$  gene expression (Figure 3). As shown  
357 in Figure 3A, the hOE TLR3KO cells exhibited significantly lower levels of IFN- $\beta$  gene  
358 expression in response to poly (I:C) induction at all concentrations tested when  
359 compared to the non-target CRISPR control cells. We observed similar reductions in  
360 the induction of IFN- $\beta$  transcription in response to poly (I:C) in the representative HeLa  
361 TLR3KO clones (Figure 3B). However, the fold-difference in IFN- $\beta$  gene induction  
362 between the TLR3-deficient clones and the non-target CRISPR control for the HeLa cells  
363 seemed to decrease at the higher poly (I:C) concentrations. We observed no noticeable  
364 differences in poly (I:C) induction of IFN- $\beta$  transcription between the WT cells and their  
365 non-target CRISPR control counterpart for either cell type (*data not shown*). These

366 findings show a successful disruption of TLR3 function in the TLR3-deficient epithelial  
367 cell clones representing human oviduct and cervical tissues.

368         In order to make comparisons to what we have previously reported on the role of  
369 TLR3 in the innate immune response to *Chlamydia* infection in the murine oviduct  
370 epithelial cells, we put more emphasis on the hOE cells in this study and selected the  
371 hOE TLR3KO clone #8 for use in the remainder of this report. We first sought to  
372 ascertain the impact of TLR3 deficiency on the *C. trachomatis*-induced synthesis of IFN-  
373  $\beta$  in the human oviduct epithelial cells. We infected hOE-WT, hOE N-Ctrl, and hOE-  
374 TLR3KO cells with 10 IFU *C. trachomatis*-L2 before harvesting cell supernatants at 18  
375 and 36h post-infection to measure the amount of IFN- $\beta$  secreted. Figure 4A shows a  
376 significant reduction in the *Chlamydia*-induced synthesis of IFN- $\beta$  in the TLR3-deficient  
377 hOE cells when compared to both the WT and non-template control cells. Our data  
378 show a 40-50% reduction in the amount of IFN- $\beta$  synthesized at both time-points and  
379 are suggestive that TLR3 plays a significant role in the optimal synthesis of IFN- $\beta$  in *C.*  
380 *trachomatis* infected hOE cells.

381         We next assessed whether our limiting dilution clonal expansion procedure  
382 introduced 'founder effects' such as causing a global dysregulation in TLR signaling that  
383 leads to the diminished synthesis of inflammatory cytokines during *Chlamydia* infection  
384 in hOE TLR3KO cells. To test whether there were founder effects introduced that  
385 negatively impacted TLR signaling in a global manner, we treated WT and TLR3-  
386 deficient hOE cells with ultrapure preparations of ligands for TLR2 (peptidoglycan),  
387 TLR5 (flagellin), and TLR9 (ODN-CpG) for 24hrs before testing supernatants for IL-6  
388 synthesis by ELISA (14). As shown in Fig. S2, we saw no significant differences

389 between WT and TLR3-deficient hOE cells in the synthesis of IL-6 when the cells were  
390 treated with agonists for either TLR2, TLR5, or TLR9. To address the possibility that  
391 reduced IFN- $\beta$  synthesis observed in the hOE-TLR3KO cells was due to pathways  
392 unrelated to TLR3 that may have been disrupted by CRISPR, we used siRNA as an  
393 alternative method to transiently disrupt TLR3 gene expression and protein function in  
394 WT hOE cells. Figure 4B demonstrates significant reductions in the amount of IFN- $\beta$   
395 secreted into the supernatants of *C. trachomatis*-L2 infected hOE cells that were  
396 pretreated with TLR3-specific siRNA 24hrs prior to infection.

397 To discern the exact nature of the TLR3 gene defect introduced by CRISPR-  
398 Cas9, clone #8 of the hOE-TLR3KO cells was selected for gene sequencing and gene  
399 sequence alignment in CLUSTAL-O. Analysis of the TLR3 gene sequencing data  
400 revealed that clone #8 of the hOE-TLR3KO cells was heterozygous for TLR3 gene  
401 disruption at exon #2 and that the resultant knockout allele incorporated a premature  
402 stop codon (TGA) at nucleotide position 141 (Figure 4C). The CRISPR-Cas9 method of  
403 gene disruption resulted in the translation of truncated TLR3 protein that is likely non-  
404 functional, and our collective data examining TLR3 protein expression and function  
405 (Figs 2-4 and Fig. S2) are suggestive that there is a minimal contribution from the TLR3  
406 allele that was not disrupted by CRISPR-Cas9 at Exon #2. Collectively, these findings  
407 show that CRISPR-Cas9 methodology was effective in disrupting TLR3 gene function in  
408 hOE cells, and corroborate our previous reports that implicate TLR3 as a major  
409 contributor to the *Chlamydia*-induced synthesis of IFN- $\beta$  during *Chlamydia* infection of  
410 oviduct epithelial cells (13, 38).

411

412 **TLR3 deficiency alters the *Chlamydia*-induced syntheses of acute inflammatory**  
413 **biomarkers in human oviduct epithelial cells.**

414 We previously reported that murine OE cells showed dysregulation in the *C. muridarum*  
415 induced syntheses of a multitude of acute inflammatory mediators, and subsequently  
416 showed that TLR3 deficient mice exhibited increased chlamydial shedding, aberrant T-  
417 cell recruitment, and more severe genital tract pathology when compared to WT mice  
418 (15, 32). To assess whether the absence of TLR3 is associated with the chlamydial-  
419 induced syntheses of key biomarkers of inflammation in human oviduct epithelial cells,  
420 we performed multiplex ELISA analysis for the detection and quantification of key  
421 human innate-immune inflammatory biomarkers. hOE-WT and hOE-TLR3KO cells were  
422 either mock-infected, infected with *C. trachomatis*-L2 for up to 30hrs, or infected with *C.*  
423 *trachomatis*-serovar D for up to 72hrs before multiplex analyses of the cell  
424 supernatants. As shown in Figures 5 and 6, TLR3-deficient hOE cells secreted  
425 significantly reduced levels of the acute inflammatory markers IL-6, IL-6Ra, sIL-6R $\beta$   
426 (gp130), IL-8, IL-20, IL-26, and IL-34 secreted into the supernatants of the *C.*  
427 *trachomatis* infected cells throughout infection. Conversely, TLR3 deficiency in hOE  
428 cells resulted in the *increased* synthesis of CCL5 and the type III interferon IL-29  
429 (IFN $\lambda$ 1) throughout infection, and IL-28A (IFN $\lambda$ 2) late in infection (Figures 6 and 7).  
430 Collectively, these data demonstrate a putative role for TLR3 in the acute phase of the  
431 innate immune response to *Chlamydia* that is known to occur early during infection *in*  
432 *vivo* (17, 39-42), and that TLR3 has some role in modulating mediators of the adaptive  
433 immune response (43).

434

435 **TLR3 has a functional role in the *C. trachomatis* induced syntheses of factors**  
436 **associated with genital tract fibrosis, scarring, and chronic inflammation.**

437 In our previous investigations into the role of TLR3 in the pathogenesis of genital  
438 infections in mice, one key aspect of TLR3 deficiency that we observed was that mice  
439 deficient in TLR3 appeared exhibit indicators of more pronounced chronic sequelae,  
440 such as lymphocytic endometritis and hydrosalpinx (32). To examine whether TLR3 has  
441 a similar role in the pathogenesis of genital tract *Chlamydia* infections in humans, we  
442 next measured the *Chlamydia*-induced synthesis of biomarkers associated with chronic  
443 inflammatory disease and tissue necrosis in the WT and TLR3 deficient hOE cells. As  
444 shown in Figures 8A and 8D, *C. trachomatis* infection induces the synthesis of soluble  
445 tumor necrosis factor receptor 1 (sTNF-R1) in both cell types; however, its synthesis  
446 was significantly lower in the TLR3-deficient hOE cells at mid-to-late times during  
447 infection. The exact role of sTNF-R1 in *Chlamydia* infection is not clear, but it is a  
448 known negative regulator of TNF $\alpha$ , which is a cytokine associated with severe genital  
449 tract sequelae in mice (44). Figure 8B shows that TLR3 deficiency leads to a similar  
450 impact on the chlamydial induced synthesis of tumor necrosis factor ligand superfamily  
451 member 13B (TNFSF13B), a cytokine that belongs to the tumor necrosis factor family  
452 that acts as a potent B-cell activator (45). Interestingly, Figures 8C and 8E shows that  
453 the syntheses of TGF- $\beta$ 1 and ICAM-1 is increased during *C. trachomatis* infection of  
454 hOE-TLR3KO cells, implicating TLR3 in the negative regulation of key components of  
455 the pathophysiological process of fibrogenesis (46).

456 The matrix metalloproteinases (MMPs) are a tightly regulated family of proteins  
457 that are involved in the breakdown of extracellular matrix in normal physiological

458 processes and are known to have a regulatory role in the inflammatory immune  
459 response, wound healing, cell migration, and embryonic development (47).  
460 Dysregulation of these proteins during *Chlamydia* infection has been demonstrated to  
461 play a role in the pathogenesis of fallopian tube damage during genital tract infections,  
462 and in corneal scarring in patients with trachoma (48, 49). To ascertain whether MMPs  
463 are synthesized in response to *C. trachomatis* infection in the hOE cells, and to  
464 determine whether TLR3 deficiency impacts their protein expression levels, we next  
465 measured the secretion of candidate MMPs into the supernatants of *C. trachomatis*  
466 infected cells in our multiplex ELISA. As shown in Figure 9, *Chlamydia* infection  
467 induced the production of MMP-1, MMP-2, MMP-3, and MMP-10 throughout infection,  
468 supporting the observations of others regarding the induction of MMPs in genital tract  
469 infections (48, 50-52). The *Chlamydia*-induced syntheses of these MMPs were either  
470 completely absent or severely diminished in their production in the TLR3-deficient hOE  
471 cells relative to hOE-WT cells when infected with the L2 serovar (Figures 8A-8C).  
472 However, the synthesis levels were more similar when infected with serovar D, albeit at  
473 significantly lower amounts in the hOE-TLR3KO cells at various points post-infection  
474 (Figures 8D-8F). Taken together, data from Figures 8 and 9 are suggestive that TLR3  
475 plays some role in regulating the syntheses of immune factors involved in modulating  
476 the genital tract pathologies associated with *Chlamydia* infection in humans.

477

478 **TLR3 signaling regulates the *Chlamydia*-induced synthesis of biomarkers**  
479 **associated with persistence, metastasis, and autoimmunity.**

480 A major factor in the protective immune response to *C. trachomatis* infection is the  
481 synthesis of gamma-interferon (IFN $\gamma$ ), which inhibits the growth of chlamydial RBs via  
482 mechanisms that lead to tryptophan starvation, chlamydial death, and eventual  
483 clearance of the bacteria (53). However, recent evidence of chlamydial reticulate  
484 bodies being able to substantially alter their gene transcription, decrease metabolism,  
485 and entering into what is known as a 'persistent' state, suggests a survival mechanism  
486 that *Chlamydia* has evolved to evade immune surveillance (54-56). Persistence in  
487 microbial infections are often implicated in the triggering of autoimmune reactions, and  
488 this was demonstrated in studies investigating the role that *Chlamydia* persistence plays  
489 in triggering self-immune reactions in infected male rodents (57).

490 To determine whether *Chlamydia* infection induces a cellular response that  
491 signals a state of persistence in the infected hOE cells, our multiplex analyses included  
492 several biomarkers for persistence and autoimmunity that are known to be secreted by  
493 cells in various clinical syndromes. Figures 10 and 11 show the results of the  
494 chlamydial induction of soluble CD163, chitinase-3-like 1, Lipocalin-2, osteopontin, and  
495 pentraxin-3 throughout infection in WT and TLR3 deficient hOE cells. As shown,  
496 *Chlamydia* induces the synthesis of sCD163 (a factor associated with long-term chronic  
497 inflammatory diseases such as rheumatoid arthritis) and the anti-apoptotic chitinase-3-  
498 like 1 protein in the hOE cells. However, our data show that the protein secretion levels  
499 of these biomarkers are significantly reduced in the absence of TLR3 when these cells  
500 were infected with the L2 serovar. Although secretion levels of sCD163 were much  
501 higher during infection with serovar D, there was no significant reduction during TLR3  
502 deficiency as was observed in the L2 infection.

503           Figures 10 and 11 show that TLR3 deficiency leads to significantly *increased*  
504 levels of osteopontin and pentraxin-3. The role of these proteins in *Chlamydia* infection  
505 is not clear; however, osteopontin is an inflammatory mediator often associated with  
506 autoimmune disease, chronic inflammatory disorders, and progression of tumor cells  
507 (58), while pentraxin-3 is a known biomarker for pelvic inflammatory disease (PID) and  
508 is also associated with autoimmune diseases (59, 60). Collectively, our findings indicate  
509 that TLR3 may have a functional role in regulating the expression of biomarkers  
510 symbolic of long-term or persistent disease states in the *Chlamydia*-infected hOE cells,  
511 which is a precondition that often correlates with the initiation of autoimmune responses  
512 and chronic sequelae (61-64).

513

#### 514 **TLR3 deficiency altered the LPS content and size of the chlamydial inclusion.**

515 Our previous investigations into mechanisms that impact the chlamydial-induced  
516 synthesis of IFN- $\beta$  showed that disruption of IFN- $\beta$  had a significant impact on the  
517 chlamydial inclusion size and chlamydial replication. In that regard, we showed that *C.*  
518 *muridarum* replication in murine OE cells deficient in either TLR3 or STAT-1 was more  
519 robust and that the inclusions were larger and aberrantly shaped [(15, 65); Fig S3]. To  
520 determine the physiological consequences of TLR3 deficiency on *Chlamydia* inclusion  
521 size in human oviduct epithelial tissue, we infected WT and TLR3-deficient hOE cells  
522 with *C. trachomatis*-serovar D at a MOI of 10 IFU/ cell for 36hrs. We next stained the  
523 cells for chlamydial LPS using the EVI-HI anti-*Chlamydia* LPS antibody, and examined  
524 the infected cells for chlamydial inclusion size and LPS content in fluorescent  
525 microscopy and multi-spectral flow cytometry, respectively. We first examined *C.*



526 *trachomatis*-serovar D infected hOE-WT and hOE-TLR3KO cells by immunofluorescent  
527 microscopy to get a qualitative comparison of the chlamydial inclusion size in order to  
528 ascertain whether TLR3 has any impact on *Chlamydia* development. As demonstrated  
529 in the representative capture shown in Figure 12, we routinely saw that the chlamydial  
530 inclusions in the TLR3-deficient hOE cells were much larger, amorphously shaped, and  
531 were more diffusely stained with punctate patterns throughout the inclusion. In contrast,  
532 the inclusions in the hOE-WT cells were generally more compact in size, more uniformly  
533 stained, and had more staining intensity per pixel than the TLR3-deficient hOE cells.  
534 We saw very similar trends in the *C. muridarum*-infected WT and TLR3(-) OE cells  
535 derived from mice (Fig. S3).

536 We further examined *C. trachomatis*-L2 infected hOE-WT and hOE-TLR3KO  
537 cells to quantitatively determine the impact of TLR3 deficiency on chlamydial inclusion  
538 development and size via multi-spectral imaging flow cytometry using the Amnis Image  
539 Stream X MKII. Figure 13 shows that cells deficient in TLR3 expression exhibited  
540 significantly increased levels of LPS within the chlamydial inclusion, based on the  
541 geometric mean fluorescence intensity differences ( $\Delta$ MF<sub>I</sub>) between the two cell types.  
542 The fluorescence results demonstrating increased fluorescence intensity in the hOE-  
543 TLR3KO cells corroborates the IF data showing that the chlamydial inclusions were  
544 larger and presumably contained more chlamydial LPS during TLR3 deficiency. Further  
545 analyses of the Multi-spectral imaging flow cytometry data in IDEAS software revealed  
546 that the average *Chlamydia* inclusion diameter was calculated to be 15.3 $\mu$ m and  
547 17.2 $\mu$ m in the hOE-WT and hOE-TLR3KO cells, respectively. Fig. S4 shows a  
548 representative image of the multi-spectral imaging flow cytometry, in which we scanned

549 (in triplicate) 10000 cells each of the hOE-WT and hOE-TLR3KO cells that were either  
550 mock-infected or infected with *C. trachomatis*-L2. Collectively, immunofluorescence  
551 analyses and the imaging flow cytometry results using antibody specific for chlamydial  
552 LPS indicate that TLR3 deficiency in human oviduct epithelium leads to increased  
553 chlamydial inclusion size and more LPS within the inclusion.

554 To examine whether *Chlamydia* replication during TLR3-deficiency correlates  
555 with the increased inclusion size and LPS content within the inclusion, we next  
556 measured chlamydial replication in wild-type and TLR3-deficient hOE cells that were  
557 infected with 5 IFU/cell *C. trachomatis*-serovar D. As shown in Figure 14, *C. trachomatis*  
558 replication was greater at all time points in the hOE-TLR3KO cells compared to the wild-  
559 type, suggesting that stimulation of TLR3 by *C. trachomatis* results in an immune  
560 response that negatively affects *Chlamydia* growth. Interestingly, our data in Figure 14  
561 show that the chlamydial replication in hOE-WT cells peaks at around 48hr post-  
562 infection before the recovery of infectious progeny begins to drop. In contrast, the  
563 recovery of infectious EBs in the *Chlamydia*-infected hOE-TLR3KO cells continued to  
564 rise past the 48hr time point (Fig. S5). Collectively, our data indicate that TLR3 plays a  
565 role in limiting *Chlamydia* replication in the HUMAN oviduct tissue and corroborates our  
566 previous studies in mice, and thus implicate TLR3 in a protective role against genital  
567 tract *Chlamydia* infections in both species.

568

## 569 **DISCUSSION**

570 Our research focuses on the impact of TLR3 signaling on the immune response to  
571 chlamydial infection in oviduct epithelium, and we were the first to demonstrate more  
572 severe genital tract pathogenesis in mice deficient in TLR3 confirming our hypothesis  
573 that TLR3 has a protective role in the immune responses to murine genital tract  
574 infections (32). In this investigation, our goal was to ascertain whether TLR3 had a  
575 similar protective role in the immune response to genital tract *Chlamydia* infection in  
576 humans and to more precisely delineate those immune responses in oviduct epithelial  
577 cells that contribute to the fibrosis and scarring that lead to reproductive sequelae in  
578 clinical disease. The OE-E6/E7 cells used in this report were derived from human  
579 Fallopian tubes and were immortalized by HPV 16 E6/E7 open reading frame (ORF) by  
580 retroviral expression (26). Although these are not primary oviduct epithelial cells, the  
581 cells are immortalized and offer the advantage of being able to be passaged in the  
582 laboratory, and they are close enough to primary oviduct epithelial cells that they can  
583 serve as an adequate representation of what we believe occurs during *in vivo*  
584 *Chlamydia*-OE cell interactions during natural genital tract infection.

585 Because the OE-E6/E7 cells express a functional TLR3, we first disrupted its  
586 gene expression and subsequent protein function using CRISPR to generate a TLR3-  
587 deficient version of the OE-E6/E7 cells, which could then be used to help delineate  
588 those immune responses to *Chlamydia* infection that are directly related to TLR3  
589 function. We were able to generate several clones of the TLR3 deficient hOE cells and  
590 demonstrated loss of both TLR3 protein expression and its functional response to the  
591 TLR3 agonist poly (I:C). We also demonstrated a significant reduction in the chlamydial  
592 induced synthesis of IFN- $\beta$  in hOE cells deficient in TLR3 function; however, the

593 reduction was a bit more modest in the hOE-TLR3KO cells when compared to that of  
594 TLR3-deficient OE cells derived from TLR3KO mice (13). The differences that we  
595 observed in the reduction in the *Chlamydia*-induced IFN- $\beta$  synthesis between the TLR3-  
596 deficient hOE and the murine OE cells are likely related to the fact that we were not able  
597 to completely disable TLR3 gene expression using CRISPR, whereas the functional  
598 TLR3 gene expression in the TLR3KO mouse is completely absent. Other possibilities  
599 to explain the more modest reduction in the *Chlamydia*-induced synthesis of IFN- $\beta$  in  
600 the hOE cells could be more significant contributions of other pathways identified to  
601 enhance to the *Chlamydia*-induced type-I IFN response such as cyclic GMP-AMP  
602 (cGAMP) synthase (cGAS) and STING in the hOE cells (16, 66). The significance of the  
603 relatively higher level of IFN- $\beta$  synthesis observed during *Chlamydia* infection in the  
604 TLR3-deficient hOE versus that of the TLR3-deficient murine OE cells is not yet known;  
605 however, we have shown that IFN- $\beta$  can regulate the chlamydial-induced syntheses of a  
606 multitude of other inflammatory mediators (15).

607 As sentinels for invasion by microbial pathogens, epithelial cells lining the  
608 reproductive tract secrete cytokines and chemokines upon chlamydial infection that  
609 functions in various facets of innate immunity such as inflammation, lymphocyte  
610 recruitment, polarization, and genital tract scarring (24, 67). We have reported that  
611 TLR3 regulates the syntheses of a multitude of these factors both *in vitro* and *in vivo* in  
612 murine OE cells and mice, and concluded that TLR3 has regulatory function affecting  
613 multiple aspects of both the innate and adaptive immune response (13, 15, 32). We  
614 demonstrate in this report that TLR3 may have a similar role in human oviduct epithelial  
615 tissue and extrapolate our findings to speculate that TLR3 deficiency may have a

616 significant role in outcomes of infections in humans. As an example, we show in  
617 Figures 5-7 that TLR3 deficiency in hOE cells leads to significant reductions in several  
618 factors associated with the acute inflammatory response such as IL-6, IL-6R $\alpha$ , sIL-6R $\beta$   
619 (gp130) and IL-8. IL-6R $\alpha$  and gp130 are the two chains that comprise the IL-6 receptor,  
620 which is a type I receptor for the pleiotropic cytokine IL-6. IL-6 represents a keystone  
621 cytokine in infection, cancer, and inflammation (68), and has been shown to have a  
622 significant role in both inhibiting *C. muridarum* infection in mice and exacerbating its  
623 pathogenicity in the mouse genital tract (69). IL-8 is a known as neutrophil chemotactic  
624 factor known to be induced early during *Chlamydia* infection and was thought to be  
625 associated with pre-term delivery complications in pregnant women infected with *C.*  
626 *trachomatis* (70).

627 Loss of TLR3 function in the hOE cells did not result in a global down-regulation  
628 in the *Chlamydia*-induced syntheses of all mediators that shape the immune response,  
629 nor was its impact limited to that of the acute inflammatory response. Our data also  
630 demonstrate that TLR3 deficiency leads to downregulation and *upregulation* in the  
631 chlamydial-induced syntheses of several cytokines and chemokines that have an impact  
632 at various phases of the adaptive immune response, which can potentially affect long-  
633 term outcomes of infection in humans and impact genital tract pathology. Figures 6 and  
634 7 show that the TLR3-deficient hOE cells produced significantly higher levels of the  
635 leukocyte recruiting factor CCL-5 (71) and the type III interferons IL-28A and IL-29 (72)  
636 when compared to WT hOE cells. The type III IFNs are hypothesized to have a role in  
637 the polarization of the immune response to *Chlamydia* infection by inhibiting the  
638 production of IL-13, IL-4 and IL-5, and thereby promoting the development of protective

639 Th1 immunity to infection (43). Our investigations into the role of TLR3 in the  
640 pathogenesis of *C. muridarum* infection in mice show that TLR3-deficiency leads to  
641 significantly altered CD4<sup>+</sup>/CD8<sup>+</sup> T-cell ratios, and increased lymphocytic infiltration into  
642 the uterine horns and oviducts by day 21 post-infection (32). The observation of  
643 significantly higher levels of the type III interferons IL-28A and IL-29 in the TLR3-  
644 deficient hOE cells supports a hypothesis that TLR3 may have a role in polarization of  
645 the immune response in humans as well, and it would manifest itself by having an effect  
646 on the recruitment of lymphocytes into the female reproductive tract in women infected  
647 with *C. trachomatis*.

648 We recently reported that TLR3 deficiency resulted in an increased frequency  
649 and severity in pronounced chronic sequelae (such as lymphocytic endometritis and  
650 hydrosalpinx) during late stages of *C. muridarum* genital tract infections in mice (32). In  
651 this report, we show that the TLR3-deficient hOE cells were dysregulated in the  
652 *Chlamydia*-induced syntheses of several biomarkers associated with chronic  
653 inflammation, and are suggestive that chronic clinical outcomes would occur in higher  
654 frequency in humans lacking functional TLR3. Collectively, our data implicate TLR3 in  
655 having some impact on regulating the incidence and severity in outcomes of chronic  
656 inflammation caused during genital tract *Chlamydia* infections in humans. TNF $\alpha$  is  
657 involved in the systemic chronic inflammation that causes many of the clinical problems  
658 associated with autoimmune disorders such as rheumatoid arthritis, ankylosing  
659 spondylitis, inflammatory bowel disease, psoriasis, and refractory asthma. (73-75).  
660 These disorders are sometimes treated by using a TNF inhibitor, many of which that  
661 either mimic the TNF $\alpha$  receptor (TNF-R1) to bind to and block its activity or is an actual

662 monoclonal antibody that binds TNF $\alpha$  (76). TLR3 deficiency in hOE cells showed  
663 defective syntheses of the soluble tumor necrosis factor receptor 1 (sTNF-R1) during *C.*  
664 *trachomatis* infection. sTNF-R1 binds to and inactivates TNF $\alpha$ , a major cytokine  
665 associated with scarring of oviduct tissue and severe genital tract sequelae in *C.*  
666 *muridarum* infected mice (44). This finding suggests that the diminished presence of  
667 sTNF-R1 in the TLR3 deficient cells would result in reduced effectiveness at inactivating  
668 *Chlamydia*-induced TNF $\alpha$ , and a subsequent increased incidence of TNF $\alpha$ -mediated  
669 scarring. In that same regard, dysregulation in the expression of matrix  
670 metalloproteinases (MMPs) is known to directly impact the severity of genital tract  
671 fibrosis and scarring in mice infected with *Chlamydia* (50-52). The *Chlamydia*-induced  
672 synthesis of MMP-1, MMP-2, MMP3, and MMP-10 was shown to be diminished in the  
673 TLR3-deficient hOE cells (Figure 9), suggesting that the normal physiological process of  
674 breaking down extracellular matrix proteins by the MMPs would be attenuated, and will  
675 likely result in increased fibrosis and scarring observed when the expression levels of  
676 certain MMPs are not sufficient (77, 78).

677 Our data showed that TLR3 deficiency in hOE cells significantly altered the  
678 *Chlamydia*-induced expression levels of biomarkers for chronic inflammation,  
679 persistence, and autoimmunity such as soluble CD163 (sCD163), Chitinase-3-like 1,  
680 Osteopontin (OPN), and Pentraxin-3 (58-60, 79-82). OPN was first identified in  
681 osteoclasts as an extracellular structural protein of bone and is known as an essential  
682 factor in bone remodeling (83). However, subsequent to the initial identification of OPN  
683 as a structural component of bone tissue, OPN has been shown to be expressed in a  
684 wide range of immune cells, including macrophages, neutrophils, dendritic cells, and

685 various lymphocyte types, and is now known to have function in several aspects of host  
686 immunity (84). The exact role that OPN plays in the immune response to *Chlamydia*  
687 infection is poorly understood; however, recent studies have linked OPN to persistent  
688 inflammation and has hypothesized a role for OPN in cell transformation during  
689 persistent *Chlamydia* infection (85, 86). Our data showing significant reductions in OPN  
690 production in the TLR3-deficient hOE cells during *C. trachomatis* infection suggest that  
691 TLR3 deficiency may lead to increased incidences of persistent infections, and  
692 proposes a role for TLR3 in the prevention of long-term chronic inflammation and  
693 possible cellular transformation. A link between sCD163, Chitinase-3-like 1, Pentraxin-3  
694 and *Chlamydia* infection has not yet been established; however, the dysregulation of  
695 these known biomarkers for chronic inflammation, persistent infection, and  
696 autoimmunity supports a role for TLR3 in limiting the clinical symptoms of chronic  
697 inflammation during infection.

698 Finally, we examined the possible impact that TLR3 deficiency in hOE cells may  
699 have on chlamydial replication and inclusion structure. We previously showed that *C.*  
700 *muridarum* replication was more robust, the inclusions were larger and more aberrantly  
701 shaped in TLR3-deficient murine OE cells, and that TLR3-deficient mice sustained  
702 significantly higher bacterial burdens than WT mice during early and mid-infection [(15,  
703 32); Fig. S3]. We hypothesized from those studies that the overall negative effect on *C.*  
704 *muridarum* biology was largely due to the host-beneficial impact of TLR3-dependent  
705 IFN- $\beta$  synthesis, and we showed that chlamydial replication in TLR3-deficient OE cells  
706 pre-treated with exogenous recombinant IFN- $\beta$  was significantly diminished (15). Here,  
707 we corroborate the mouse studies by showing that the inclusions were substantially



708 larger, and they were stained in a more punctate and diffuse pattern in TLR3-deficient  
709 hOE cells 36hrs after infection with *C. trachomatis*-serovar D. Imaging flow-cytometry  
710 revealed that TLR3-deficient hOE cells had higher levels of *Chlamydia* LPS within the  
711 chlamydial inclusion at 24hr post-infection when infected with *C. trachomatis*-L2 and are  
712 highly suggestive that the larger inclusions contain more bacterial particles. We  
713 consistently observed higher levels of *Chlamydia* replication in the TLR3-deficient hOE  
714 cells at all time-points between 24 and 72hrs post-infection (Figure 14 and Fig. S5) and  
715 that the differences were statistically significant after 48hs post-infection. Our data  
716 showing that TLR3 deficiency in hOE cells leads to the significant decreases in the  
717 chlamydial-induced synthesis of IFN- $\beta$  implicates this cytokine in the control of  
718 *Chlamydia* infection in human genital tract epithelial cells as was observed in mice.  
719 However, our data in Figure 11 showed that TLR3-deficiency in hOE cells also resulted  
720 in drastic reductions in the chlamydial-induced secretion of lipocalin-2, which is an  
721 innate-immune protein that limits bacterial growth by sequestering iron-containing  
722 siderophores (87). Although it is unclear exactly which mechanism exerts the greatest  
723 impact on regulating chlamydial growth in hOE cells, our data are suggestive that there  
724 are likely redundant mechanisms that control *Chlamydia* replication that are disrupted  
725 during TLR3 deficiency.

726 Collectively, all of our previous investigations into the impact of TLR3 in the  
727 immune response to *Chlamydia* infection in mice have demonstrated a protective role  
728 for TLR3 in regards to genital tract pathology, and our data represents the first of such  
729 in regards to *Chlamydia* infection. Although the exact mechanism(s) that TLR3 invokes  
730 to elicit this protective immunity is unknown and needs further study, our preliminary

731 investigations implicate TLR3 function in upregulating gene expression of other TLRs  
732 known to have impact on genital tract pathology (such as TLR2; (12)), through  
733 pathways involving IFN- $\beta$  synthesis (15). In this report, we expanded our investigations  
734 into examining the impact of TLR3 in the immune response to *Chlamydia* infection in  
735 human oviduct epithelial cells, and our initial results thus far show a similar role for  
736 TLR3 in the protective immune response in humans. Studies are currently underway to  
737 further investigate the role of this enigmatic Toll-like receptor in human genital tract  
738 *Chlamydia* infection.

739

#### 740 **ACKNOWLEDGMENTS**

741 We thank Dr. David Nelson and his lab members for providing *C. trachomatis*-L2 strain,  
742 Serovar D, *Chlamydia* LPS antibody, for the use of the EVOS system, their thoughtful  
743 discussion, and their support. We also thank Dr. Cheikh Seye for access to the Wes™  
744 Simple Western system. We thank the Multiplex Analysis Core at Indiana University's  
745 Melvin and Bren Simon Cancer Center for providing support in analyzing samples and  
746 interpretation of data. This work was supported by NIH Grant AI104944 to W.A.D.

747

#### 748 **REFERENCES**

749

- 750 1. **CDC** 2017, posting date. 2015 Sexually Transmitted Diseases Survey. [Online.]
- 751 2. **Farley TA, Cohen DA, Elkins W.** 2003. Asymptomatic sexually transmitted diseases: the case for  
752 screening. *Prev Med* **36**:502-509.

- 753 3. **Korenromp EL, Sudaryo MK, de Vlas SJ, Gray RH, Sewankambo NK, Serwadda D, Wawer MJ,**  
754 **Habbema JD.** 2002. What proportion of episodes of gonorrhoea and chlamydia becomes  
755 symptomatic? *Int J STD AIDS* **13**:91-101.
- 756 4. **Elwell C, Mirrashidi K, Engel J.** 2016. Chlamydia cell biology and pathogenesis. *Nat Rev Microbiol*  
757 **14**:385-400.
- 758 5. **Nanni C, Marangoni A, Quarta C, Di Pierro D, Rizzello A, Trespidi S, D'Ambrosio D, Ambrosini V,**  
759 **Donati M, Aldini R, Zanotti-Fregonara P, Grassetto G, Rubello D, Fanti S, Cevenini R.** 2009.  
760 Small animal PET for the evaluation of an animal model of genital infection. *Clin Physiol Funct*  
761 *Imaging* **29**:187-192.
- 762 6. **Jerchel S, Knebel G, Konig P, Bohlmann MK, Rupp J.** 2012. A human fallopian tube model for  
763 investigation of *C. trachomatis* infections. *J Vis Exp*.
- 764 7. **Chow JM, Yonekura ML, Richwald GA, Greenland S, Sweet RL, Schachter J.** 1990. The  
765 association between *Chlamydia trachomatis* and ectopic pregnancy. A matched-pair, case-  
766 control study. *JAMA* **263**:3164-3167.
- 767 8. **Naderi T, Kazerani F, Bahraminpoor A.** 2012. Comparison of chlamydia infection prevalence  
768 between patients with and without ectopic pregnancy using the PCR method. *Ginekol Pol*  
769 **83**:819-821.
- 770 9. **Chen L, Lei L, Chang X, Li Z, Lu C, Zhang X, Wu Y, Yeh IT, Zhong G.** 2010. Mice deficient in  
771 MyD88 Develop a Th2-dominant response and severe pathology in the upper genital tract  
772 following *Chlamydia muridarum* infection. *J Immunol* **184**:2602-2610.
- 773 10. **Stephens RS.** 2003. The cellular paradigm of chlamydial pathogenesis. *Trends Microbiol* **11**:44-  
774 51.
- 775 11. **Bakken TE, Roddey JC, Djurovic S, Akshoomoff N, et, al.,.** 2012. Association of common genetic  
776 variants in GPCPD1 with scaling of visual cortical surface area in humans. *Proceedings of the*  
777 *National Academy of Sciences of the United States of America* **109**:3985-3990.
- 778 12. **Darville T, O'Neill JM, Andrews CW, Jr., Nagarajan UM, Stahl L, Ojcius DM.** 2003. Toll-like  
779 receptor-2, but not Toll-like receptor-4, is essential for development of oviduct pathology in  
780 chlamydial genital tract infection. *J Immunol* **171**:6187-6197.
- 781 13. **Derbigny WA, Johnson RM, Toomey KS, Ofner S, Jayarapu K.** 2010. The *Chlamydia muridarum*-  
782 induced IFN-beta response is TLR3-dependent in murine oviduct epithelial cells. *J Immunol*  
783 **185**:6689-6697.
- 784 14. **Derbigny WA, Kerr MS, Johnson RM.** 2005. Pattern recognition molecules activated by  
785 *Chlamydia muridarum* infection of cloned murine oviduct epithelial cell lines. *J Immunol*  
786 **175**:6065-6075.
- 787 15. **Derbigny WA, Shobe LR, Kamran JC, Toomey KS, Ofner S.** 2012. Identifying a role for Toll-like  
788 receptor 3 in the innate immune response to *Chlamydia muridarum* infection in murine oviduct  
789 epithelial cells. *Infection and immunity* **80**:254-265.
- 790 16. **Prantner D, Darville T, Nagarajan UM.** 2010. Stimulator of IFN gene is critical for induction of  
791 IFN-beta during *Chlamydia muridarum* infection. *J Immunol* **184**:2551-2560.
- 792 17. **Rank RG, Lacy HM, Goodwin A, Sikes J, Whittimore J, Wyrick PB, Nagarajan UM.** 2010. Host  
793 chemokine and cytokine response in the endocervix within the first developmental cycle of  
794 *Chlamydia muridarum*. *Infection and immunity* **78**:536-544.
- 795 18. **Welter-Stahl L, Ojcius DM, Viala J, Girardin S, Liu W, Delarbre C, Philpott D, Kelly KA, Darville T.**  
796 2006. Stimulation of the cytosolic receptor for peptidoglycan, Nod1, by infection with *Chlamydia*  
797 *trachomatis* or *Chlamydia muridarum*. *Cell Microbiol* **8**:1047-1057.
- 798 19. **Da Costa CU, Wantia N, Kirschning CJ, Busch DH, Rodriguez N, Wagner H, Miethke T.** 2004.  
799 Heat shock protein 60 from *Chlamydia pneumoniae* elicits an unusual set of inflammatory  
800 responses via Toll-like receptor 2 and 4 in vivo. *European journal of immunology* **34**:2874-2884.

- 801 20. **Erridge C, Pridmore A, Eley A, Stewart J, Poxton IR.** 2004. Lipopolysaccharides of *Bacteroides*  
802 *fragilis*, *Chlamydia trachomatis* and *Pseudomonas aeruginosa* signal via toll-like receptor 2. *J*  
803 *Med Microbiol* **53**:735-740.
- 804 21. **Netea MG, Kullberg BJ, Galama JM, Stalenhoef AF, Dinarello CA, Van der Meer JW.** 2002. Non-  
805 LPS components of *Chlamydia pneumoniae* stimulate cytokine production through Toll-like  
806 receptor 2-dependent pathways. *European journal of immunology* **32**:1188-1195.
- 807 22. **Prebeck S, Kirschning C, Durr S, da Costa C, Donath B, Brand K, Redecke V, Wagner H, Miethke**  
808 **T.** 2001. Predominant role of toll-like receptor 2 versus 4 in *Chlamydia pneumoniae*-induced  
809 activation of dendritic cells. *J Immunol* **167**:3316-3323.
- 810 23. **Aziz A.** 2006. A study on immunopathogenetic mechanisms of atherosclerotic process caused by  
811 chronic infection of *Chlamydia pneumoniae* in rats (*Ratus norvegicus*). *Acta Med Indones*  
812 **38**:206-212.
- 813 24. **Johnson RM.** 2004. Murine oviduct epithelial cell cytokine responses to *Chlamydia muridarum*  
814 infection include interleukin-12-p70 secretion. *Infection and immunity* **72**:3951-3960.
- 815 25. **Li HW, Liao SB, Chiu PC, Tam WW, Ho JC, Ng EH, Ho PC, Yeung WS, Tang F, O WS.** 2010.  
816 Expression of adrenomedullin in human oviduct, its regulation by the hormonal cycle and  
817 contact with spermatozoa, and its effect on ciliary beat frequency of the oviductal epithelium. *J*  
818 *Clin Endocrinol Metab* **95**:E18-25.
- 819 26. **Lee YL, Lee KF, Xu JS, Wang YL, Tsao SW, Yeung WS.** 2001. Establishment and characterization  
820 of an immortalized human oviductal cell line. *Molecular reproduction and development* **59**:400-  
821 409.
- 822 27. **Zandieh Z, Ashrafi M, Jameie B, Amanpour S, Mosaffa N, Salman Yazdi R, Pacey A, Aflatoonian**  
823 **R.** 2015. Evaluation of immunological interaction between spermatozoa and fallopian tube  
824 epithelial cells. *Andrologia* **47**:1120-1130.
- 825 28. **Shaw JL, Wills GS, Lee KF, Horner PJ, McClure MO, Abrahams VM, Wheelhouse N, Jabbour HN,**  
826 **Critchley HO, Entrican G, Horne AW.** 2011. *Chlamydia trachomatis* infection increases fallopian  
827 tube PROKR2 via TLR2 and NFkappaB activation resulting in a microenvironment predisposed to  
828 ectopic pregnancy. *Am J Pathol* **178**:253-260.
- 829 29. **Nagarajan UM, Ojcius DM, Stahl L, Rank RG, Darville T.** 2005. *Chlamydia trachomatis* induces  
830 expression of IFN-gamma-inducible protein 10 and IFN-beta independent of TLR2 and TLR4, but  
831 largely dependent on MyD88. *J Immunol* **175**:450-460.
- 832 30. **O'Connell CM, Ionova IA, Quayle AJ, Visintin A, Ingalls RR.** 2006. Localization of TLR2 and  
833 MyD88 to *Chlamydia trachomatis* inclusions. Evidence for signaling by intracellular TLR2 during  
834 infection with an obligate intracellular pathogen. *The Journal of biological chemistry* **281**:1652-  
835 1659.
- 836 31. **Yang X, Coriolan D, Schultz K, Golenbock DT, Beasley D.** 2005. Toll-like receptor 2 mediates  
837 persistent chemokine release by *Chlamydia pneumoniae*-infected vascular smooth muscle cells.  
838 *Arteriosclerosis, thrombosis, and vascular biology* **25**:2308-2314.
- 839 32. **Carrasco SE, Hu S, Imai DM, Kumar R, Sandusky GE, Yang XF, Derbigny WA.** 2018. Toll-like  
840 receptor 3 (TLR3) promotes the resolution of *Chlamydia muridarum* genital tract infection in  
841 congenic C57BL/6N mice. *PLoS One* **13**:e0195165.
- 842 33. **Brothwell JA, Muramatsu MK, Toh E, Rockey DD, Putman TE, Barta ML, Hefty PS, Suchland RJ,**  
843 **Nelson DE.** 2016. Interrogating Genes That Mediate *Chlamydia trachomatis* Survival in Cell  
844 Culture Using Conditional Mutants and Recombination. *Journal of bacteriology* **198**:2131-2139.
- 845 34. **Skovdahl HK, Granlund AvB, Østvik AE, Bruland T, Bakke I, Torp SH, Damås JK, Sandvik AK.**  
846 2015. Expression of CCL20 and Its Corresponding Receptor CCR6 Is Enhanced in Active  
847 Inflammatory Bowel Disease, and TLR3 Mediates CCL20 Expression in Colonic Epithelial Cells.  
848 *PLoS one* **10**:e0141710-e0141710.

- 849 35. **Matsumoto M, Funami K, Tanabe M, Oshiumi H, Shingai M, Seto Y, Yamamoto A, Seya T.** 2003.  
850 Subcellular localization of Toll-like receptor 3 in human dendritic cells. *J Immunol* **171**:3154-  
851 3162.
- 852 36. **Matsumoto M, Kikkawa S, Kohase M, Miyake K, Seya T.** 2002. Establishment of a monoclonal  
853 antibody against human Toll-like receptor 3 that blocks double-stranded RNA-mediated  
854 signaling. *Biochemical and biophysical research communications* **293**:1364-1369.
- 855 37. **Carpenter S, O'Neill LA.** 2009. Recent insights into the structure of Toll-like receptors and post-  
856 translational modifications of their associated signalling proteins. *Biochem J* **422**:1-10.
- 857 38. **Derbigny WA, Hong SC, Kerr MS, Temkit M, Johnson RM.** 2007. Chlamydia muridarum infection  
858 elicits a beta interferon response in murine oviduct epithelial cells dependent on interferon  
859 regulatory factor 3 and TRIF. *Infection and immunity* **75**:1280-1290.
- 860 39. **Cheng W, Shivshankar P, Li Z, Chen L, Yeh IT, Zhong G.** 2008. Caspase-1 contributes to  
861 Chlamydia trachomatis-induced upper urogenital tract inflammatory pathologies without  
862 affecting the course of infection. *Infection and immunity* **76**:515-522.
- 863 40. **Darville T, Andrews CW, Jr., Sikes JD, Fraley PL, Rank RG.** 2001. Early local cytokine profiles in  
864 strains of mice with different outcomes from chlamydial genital tract infection. *Infection and*  
865 *immunity* **69**:3556-3561.
- 866 41. **Maxion HK, Kelly KA.** 2002. Chemokine expression patterns differ within anatomically distinct  
867 regions of the genital tract during Chlamydia trachomatis infection. *Infection and immunity*  
868 **70**:1538-1546.
- 869 42. **Tseng CT, Rank RG.** 1998. Role of NK cells in early host response to chlamydial genital infection.  
870 *Infection and immunity* **66**:5867-5875.
- 871 43. **Wan C, Latter JL, Amirshahi A, Symonds I, Finnie J, Bowden N, Scott RJ, Cunningham KA,**  
872 **Timms P, Beagley KW.** 2014. Progesterone activates multiple innate immune pathways in  
873 Chlamydia trachomatis-infected endocervical cells. *Am J Reprod Immunol* **71**:165-177.
- 874 44. **Murthy AK, Li W, Chaganty BK, Kamalakaran S, Guentzel MN, Seshu J, Forsthuber TG, Zhong G,**  
875 **Arulanandam BP.** 2011. Tumor necrosis factor alpha production from CD8+ T cells mediates  
876 oviduct pathological sequelae following primary genital Chlamydia muridarum infection.  
877 *Infection and immunity* **79**:2928-2935.
- 878 45. **Schneider P, MacKay F, Steiner V, Hofmann K, Bodmer JL, Holler N, Ambrose C, Lawton P,**  
879 **Bixler S, Acha-Orbea H, Valmori D, Romero P, Werner-Favre C, Zubler RH, Browning JL,**  
880 **Tschopp J.** 1999. BAFF, a novel ligand of the tumor necrosis factor family, stimulates B cell  
881 growth. *J Exp Med* **189**:1747-1756.
- 882 46. **Igietseme JU, Omosun Y, Nagy T, Stuchlik O, Reed MS, He Q, Partin J, Joseph K, Ellerson D,**  
883 **George Z, Goldstein J, Eko FO, Bandea C, Pohl J, Black CM.** 2018. Molecular Pathogenesis of  
884 Chlamydia Disease Complications: Epithelial-Mesenchymal Transition and Fibrosis. *Infection and*  
885 *immunity* **86**.
- 886 47. **Nagase H, Woessner JF, Jr.** 1999. Matrix metalloproteinases. *The Journal of biological chemistry*  
887 **274**:21491-21494.
- 888 48. **Ault KA, Kelly KA, Ruther PE, Izzo AA, Izzo LS, Sigar IM, Ramsey KH.** 2002. Chlamydia  
889 trachomatis enhances the expression of matrix metalloproteinases in an in vitro model of the  
890 human fallopian tube infection. *American journal of obstetrics and gynecology* **187**:1377-1383.
- 891 49. **El-Asrar AM, Geboes K, Al-Kharashi SA, Al-Mosallam AA, Missotten L, Paemen L, Opdenakker**  
892 **G.** 2000. Expression of gelatinase B in trachomatous conjunctivitis. *Br J Ophthalmol* **84**:85-91.
- 893 50. **Imtiaz MT, Distelhorst JT, Schripsema JH, Sigar IM, Kasimos JN, Lacy SR, Ramsey KH.** 2007. A  
894 role for matrix metalloproteinase-9 in pathogenesis of urogenital Chlamydia muridarum  
895 infection in mice. *Microbes Infect* **9**:1561-1566.

- 896 51. **Imtiaz MT, Schripsema JH, Sigar IM, Kasimos JN, Ramsey KH.** 2006. Inhibition of matrix  
897 metalloproteinases protects mice from ascending infection and chronic disease manifestations  
898 resulting from urogenital *Chlamydia muridarum* infection. *Infection and immunity* **74**:5513-  
899 5521.
- 900 52. **Pal S, Schmidt AP, Peterson EM, Wilson CL, de la Maza LM.** 2006. Role of matrix  
901 metalloproteinase-7 in the modulation of a *Chlamydia trachomatis* infection. *Immunology*  
902 **117**:213-219.
- 903 53. **Brunham RC, Rey-Ladino J.** 2005. Immunology of *Chlamydia* infection: implications for a  
904 *Chlamydia trachomatis* vaccine. *Nature reviews. Immunology* **5**:149-161.
- 905 54. **Witkin SS, Minis E, Athanasiou A, Leizer J, Linhares IM.** 2017. *Chlamydia trachomatis*: the  
906 Persistent Pathogen. *Clin Vaccine Immunol* **24**.
- 907 55. **Beatty WL, Belanger TA, Desai AA, Morrison RP, Byrne GI.** 1994. Tryptophan depletion as a  
908 mechanism of gamma interferon-mediated chlamydial persistence. *Infection and immunity*  
909 **62**:3705-3711.
- 910 56. **Beatty WL, Byrne GI, Morrison RP.** 1993. Morphologic and antigenic characterization of  
911 interferon gamma-mediated persistent *Chlamydia trachomatis* infection in vitro. *Proceedings of*  
912 *the National Academy of Sciences of the United States of America* **90**:3998-4002.
- 913 57. **Mackern-Oberti JP, Motrich RD, Breser ML, Cejas H, Cuffini C, Maccioni M, Rivero VE.** 2011.  
914 Male rodent genital tract infection with *Chlamydia muridarum*: persistence in the prostate gland  
915 that triggers self-immune reactions in genetically susceptible hosts. *J Urol* **186**:1100-1106.
- 916 58. **Rittling SR, Singh R.** 2015. Osteopontin in Immune-mediated Diseases. *J Dent Res* **94**:1638-1645.
- 917 59. **Huang XL, Zhang L, Duan Y, Wang YJ, Wang J.** 2016. Association of Pentraxin 3 with  
918 Autoimmune Diseases: A Systematic Review and Meta-Analysis. *Arch Med Res* **47**:223-231.
- 919 60. **Yang SF, Wu TF, Tsai HT, Lin LY, Wang PH.** 2014. New markers in pelvic inflammatory disease.  
920 *Clin Chim Acta* **431**:118-124.
- 921 61. **Baio P, Brucato A, Buskila D, Gershwin ME, Giacomazzi D, Lopez LR, Luzzati R, Matsuura E,**  
922 **Selmi C, Sarzi-Puttini P, Atzeni F, Kessel A, Toubi E.** 2008. Autoimmune diseases and infections:  
923 controversial issues Chronic HCV-related autoimmunity: a consequence of viral persistence and  
924 lymphotropism. *Clin Exp Rheumatol* **26**:S74-80.
- 925 62. **Teixeira AR, Hecht MM, Guimaro MC, Sousa AO, Nitz N.** 2011. Pathogenesis of chagas' disease:  
926 parasite persistence and autoimmunity. *Clin Microbiol Rev* **24**:592-630.
- 927 63. **Dolcino M, Puccetti A, Barbieri A, Bason C, Tinazzi E, Ottria A, Patuzzo G, Martinelli N, Lunardi**  
928 **C, Kung TN, Bykerk VP, Teixeira AR, Hecht MM, Guimaro MC, Sousa AO, Nitz N.** 2015.  
929 Infections and autoimmunity: role of human cytomegalovirus in autoimmune endothelial cell  
930 damage Detecting the earliest signs of rheumatoid arthritis: symptoms and examination  
931 Pathogenesis of chagas' disease: parasite persistence and autoimmunity. *Lupus* **24**:419-432.
- 932 64. **Sebastiani GD, Galeazzi M, Baio P, Brucato A, Buskila D, Gershwin ME, Giacomazzi D, Lopez LR,**  
933 **Luzzati R, Matsuura E, Selmi C, Sarzi-Puttini P, Atzeni F, Kessel A, Toubi E.** 2009. Infection--  
934 genetics relationship in systemic lupus erythematosus Autoimmune diseases and infections:  
935 controversial issues Chronic HCV-related autoimmunity: a consequence of viral persistence and  
936 lymphotropism. *Lupus* **18**:1169-1175.
- 937 65. **Hosey KL, Hu S, Derbigny WA.** 2015. Role of STAT1 in *Chlamydia*-Induced Type-1 Interferon  
938 Production in Oviduct Epithelial Cells. *J Interferon Cytokine Res* **35**:901-916.
- 939 66. **Zhang Y, Yeruva L, Marinov A, Prantner D, Wyrick PB, Lupashin V, Nagarajan UM.** 2014. The  
940 DNA sensor, cyclic GMP-AMP synthase, is essential for induction of IFN-beta during *Chlamydia*  
941 *trachomatis* infection. *J Immunol* **193**:2394-2404.

- 942 67. **Kagnoff MF, Eckmann L.** 1997. Epithelial cells as sensors for microbial infection. *The Journal of*  
943 *clinical investigation* **100**:6-10.
- 944 68. **Hunter CA, Jones SA.** 2015. IL-6 as a keystone cytokine in health and disease. *Nat Immunol*  
945 **16**:448-457.
- 946 69. **Sun X, Tian Q, Wang L, Xue M, Zhong G.** 2017. IL-6-mediated signaling pathways limit *Chlamydia*  
947 *muridarum* infection and exacerbate its pathogenicity in the mouse genital tract. *Microbes*  
948 *Infect* **19**:536-545.
- 949 70. **Vogel I, Thorsen P, Curry A, Sandager P, Uldbjerg N.** 2005. Biomarkers for the prediction of  
950 preterm delivery. *Acta Obstet Gynecol Scand* **84**:516-525.
- 951 71. **Maghazachi AA, Al-Aoukaty A, Schall TJ.** 1996. CC chemokines induce the generation of killer  
952 cells from CD56+ cells. *European journal of immunology* **26**:315-319.
- 953 72. **Li M, Liu X, Zhou Y, Su SB.** 2009. Interferon-lambdas: the modulators of antiviral, antitumor,  
954 and immune responses. *J Leukoc Biol* **86**:23-32.
- 955 73. **Billmeier U, Dieterich W, Neurath MF, Atreya R.** 2016. Molecular mechanism of action of anti-  
956 tumor necrosis factor antibodies in inflammatory bowel diseases. *World J Gastroenterol*  
957 **22**:9300-9313.
- 958 74. **Deodhar A, Yu D, Mantravadi S, Ogdie A, Kraft WK.** 2017. Switching tumor necrosis factor  
959 inhibitors in the treatment of axial spondyloarthritis
- 960 Tumor necrosis factor inhibitors in psoriatic arthritis. *Semin Arthritis Rheum* **47**:343-350.
- 961 75. **Kalden JR, Schulze-Koops H, Prado MS, Bendtzen K, Andrade LEC, Cohen BL, Sachar DB, Chang**  
962 **R, Yee KL, Sumbria RK.** 2017. Immunogenicity and loss of response to TNF inhibitors:  
963 implications for rheumatoid arthritis treatment Biological anti-TNF drugs: immunogenicity  
964 underlying treatment failure and adverse events Update on anti-tumor necrosis factor agents  
965 and other new drugs for inflammatory bowel disease
- 966 Tumor necrosis factor alpha Inhibition for Alzheimer's Disease. *Nat Rev Rheumatol* **13**:707-718.
- 967 76. **Haraoui B, Bykerk V.** 2007. Etanercept in the treatment of rheumatoid arthritis. *Ther Clin Risk*  
968 *Manag* **3**:99-105.
- 969 77. **Lee DE, Trowbridge RM, Ayoub NT, Agrawal DK.** 2015. High-mobility Group Box Protein-1,  
970 Matrix Metalloproteinases, and Vitamin D in Keloids and Hypertrophic Scars. *Plast Reconstr Surg*  
971 *Glob Open* **3**:e425.
- 972 78. **Rohani MG, Parks WC, Lee DE, Trowbridge RM, Ayoub NT, Agrawal DK.** 2015. Matrix  
973 remodeling by MMPs during wound repair High-mobility Group Box Protein-1, Matrix  
974 Metalloproteinases, and Vitamin D in Keloids and Hypertrophic Scars. *Matrix Biol* **44-46**:113-  
975 121.
- 976 79. **Kirkegaard-Klitbo DM, Mejer N, Knudsen TB, Moller HJ, Moestrup SK, Poulsen SD, Kronborg G,**  
977 **Benfield T.** 2017. Soluble CD163 predicts incident chronic lung, kidney and liver disease in HIV  
978 infection. *AIDS* **31**:981-988.
- 979 80. **Zhi Y, Gao P, Xin X, Li W, Ji L, Zhang L, Zhang X, Zhang J.** 2017. Clinical significance of sCD163  
980 and its possible role in asthma (Review). *Mol Med Rep* **15**:2931-2939.
- 981 81. **Di Rosa M, Distefano G, Zorena K, Malaguarnera L.** 2016. Chitinases and immunity: Ancestral  
982 molecules with new functions. *Immunobiology* **221**:399-411.
- 983 82. **Nathan N, Corvol H, Amselem S, Clement A, Di Rosa M, Malaguarnera L, Di Rosa M, Distefano**  
984 **G, Zorena K, Malaguarnera L.** 2015. Biomarkers in Interstitial lung diseases Chitinase 3 Like-1:  
985 An Emerging Molecule Involved in Diabetes and Diabetic Complications Chitinases and  
986 immunity: Ancestral molecules with new functions. *Paediatr Respir Rev* **16**:219-224.

- 987 83. **Choi ST, Kim JH, Kang EJ, Lee SW, Park MC, Park YB, Lee SK.** 2008. Osteopontin might be  
988 involved in bone remodelling rather than in inflammation in ankylosing spondylitis.  
989 *Rheumatology (Oxford)* **47**:1775-1779.
- 990 84. **Wang KX, Denhardt DT.** 2008. Osteopontin: role in immune regulation and stress responses.  
991 *Cytokine Growth Factor Rev* **19**:333-345.
- 992 85. **De Filippis A, Buommino E, Domenico MD, Feola A, Brunetti-Pierri R, Rizzo A, Rizzo A,**  
993 **Carratelli CR, De Filippis A, Bevilacqua N, Tufano MA, Buommino E.** 2017. Chlamydia  
994 trachomatis induces an upregulation of molecular biomarkers podoplanin, Wilms' tumour gene  
995 1, osteopontin and inflammatory cytokines in human mesothelial cells Transforming activities of  
996 Chlamydia pneumoniae in human mesothelial cells. *Microbiology* **163**:654-663.
- 997 86. **Rizzo A, Carratelli CR, De Filippis A, Bevilacqua N, Tufano MA, Buommino E.** 2014.  
998 Transforming activities of Chlamydia pneumoniae in human mesothelial cells. *Int Microbiol*  
999 **17**:185-193.
- 1000 87. **Flo TH, Smith KD, Sato S, Rodriguez DJ, Holmes MA, Strong RK, Akira S, Aderem A.** 2004.  
1001 Lipocalin 2 mediates an innate immune response to bacterial infection by sequestering iron.  
1002 *Nature* **432**:917-921.

1003

1004



1005 **Figure Legends**

1006

1007 **FIGURE 1. TLR3 is present and functional in human OE-E6/7 cells.** Human OE-  
1008 E6/7 cells were seeded in 12 well plates and cultured in DMEM only, or DMEM  
1009 supplemented with either poly (I:C) for 24hrs or infected with 10 IFU/ cell *C.*  
1010 *trachomatis*-L2 for 36hrs. (A) Poly (I:C) induced the expression of IFN- $\beta$  mRNA in a  
1011 dose-dependent manner. Relative expression of (B) IFN- $\beta$  mRNA and (C) TLR3 mRNA  
1012 in response to *C. trachomatis*-L2 infection at the time-point indicated. Data are  
1013 representative of at least three independent experiments.

1014

1015 **FIGURE 2. Disruption of TLR3 protein expression in human oviduct and cervical**  
1016 **cells.** Wes™ simple western system was used to confirm the disruption of TLR3 protein  
1017 expression: (A) Human OE-E6/7 cells. Lane 1, Ladder; lane 2, 400ng WT human OE-  
1018 E6/7 cell protein; lane 3, 400ng hOE-TLR3KO cell protein. (B) Hela cells. Lane 1,  
1019 Ladder; lane 2, 400ng WT Hela cell protein; lane 3, 400ng Hela-TLR3KO cell protein.  
1020 Data presented are representative data of selected TLR3-deficient clones from both cell  
1021 types.

1022

1023 **FIGURE 3. Disruption of TLR3 function by CRISPR dramatically decreases IFN- $\beta$**   
1024 **mRNA expression in response to poly (I:C) stimulation.** Selected clones  
1025 representing TLR3-deficient: (A) Oviduct [hOE] and (B) Cervical [Hela] cells were  
1026 treated with 0, 25, 50, 100  $\mu$ g/mL poly (I:C) for 24hrs. The cells were harvested for total

1027 cell RNA isolation. The response to poly (I:C) was determined by measuring the  
1028 induction of IFN- $\beta$  mRNA synthesis via qPCR. The relative gene expression levels of  
1029 each clone compared to their respective non-target CRISPR controls are shown. Data  
1030 are representative of at least three independent experiments.

1031

1032 **FIGURE 4. TLR3 deficiency results in the decreased synthesis of IFN- $\beta$  during *C.***  
1033 ***trachomatis* infection of oviduct epithelium.** (A) WT and TLR3-deficient hOE cells  
1034 were either mock infected or infected with *C. trachomatis*-L2 at a MOI 10 IFU/ cell for up  
1035 to 36hrs. Supernatants were collected from cells representing mock, 18h, and 36h post-  
1036 infection before measuring the chlamydial induced synthesis of IFN- $\beta$  by standard  
1037 ELISA. (B) WT hOE cells were infected with 10 IFU/cell *C. trachomatis*-L2 24hrs after  
1038 treatment with 2.5  $\mu$ g/ml of either si-SCR or TLR3-specific siRNA (si-TLR3).  
1039 Supernatants were harvested at 24hrs post-infection to measure the chlamydial induced  
1040 synthesis of IFN- $\beta$  by standard ELISA. (C) CLUSTAL-O multiple sequence alignment of  
1041 a sequenced PCR product containing exon #2 of human TLR3 reveal early stop codon  
1042 (TGA) at position 141. The TGA stop codon is inside the red box, and gRNA  
1043 sequences are highlighted with a green line. Data are representative of at least 3  
1044 independent experiments. Statistically significant differences are shown by asterisks  
1045 (\*\*\*,  $p < 0.005$ ).

1046

1047

1048 **FIGURE 5. TLR3 deficiency results in the attenuation of many of the acute-phase**  
1049 **inflammatory mediators.** WT and TLR3-deficient hOE cells were infected with *C.*  
1050 *trachomatis*-L2 at a MOI 10 IFU/ cell for up to 30hrs. Supernatants were collected from  
1051 individual wells every 6 hours for multiplex ELISA analyses to measure the expression  
1052 of: (A) IL-6R $\alpha$ ; (B) sIL-6R $\beta$  (gp130), (C) IL-8, (D) IL-20, (E) IL-26, and (F) IL-34.  
1053 Statistically significant differences are shown by asterisks (\*\*,  $p < 0.01$ ; \*\*\*,  $p < 0.001$ ).  
1054 Data are representative of three independent experiments.

1055

1056 **FIGURE 6. TLR3 deficiency alters the acute-phase inflammatory mediator**  
1057 **synthesis during infection with *C. trachomatis*-serovar D.** WT and TLR3-deficient  
1058 hOE cells were infected with *C. trachomatis*-serovar D at a MOI 10 IFU/ cell for up to  
1059 72hrs. Supernatants were collected from individual wells at the time listed for multiplex  
1060 ELISA analyses to measure the expression of: (A) IL-6, (B) IL-6R $\alpha$ , (C) sIL-6R $\beta$   
1061 (gp130), (D) IL-8, and (E) CCL5. Statistically significant differences are shown by  
1062 asterisks (\*,  $p < 0.05$ ; \*\*,  $p < 0.01$ ; \*\*\*,  $p < 0.005$ ). Data are representative of three  
1063 independent experiments.

1064

1065 **FIGURE 7. TLR3 deficiency causes the increased expression of type-III IFNs.** WT  
1066 and TLR3-deficient hOE cells were infected with *C. trachomatis*-L2 at a MOI 10 IFU/ cell  
1067 for up to 30hrs. Supernatants were collected from individual wells every 6 hours for  
1068 multiplex ELISA analyses to measure the expression of: (A) IL-29 and (B) IL-28A.

1069 Statistically significant differences are shown by asterisks (\*\*,  $p < 0.01$ ; \*\*\*,  $p < 0.001$ ).

1070 Data are representative of three independent experiments.

1071

1072 **FIGURE 8. TLR3 deficiency alters the synthesis of cytokines associated with**

1073 **cellular adhesion and tissue integrity during genital tract infection with *C.***

1074 ***trachomatis*.** WT and TLR3-deficient hOE cells were infected with either *C.*

1075 *trachomatis*-L2 (**A-B**) or *C. trachomatis*-serovar D (**C-E**) at a MOI 10 IFU/ cell for up to

1076 72hrs. Supernatants were collected from individual wells at the time listed for multiplex

1077 ELISA analyses to measure the expression of: (**A, D**) sTNF-R1, (**B**) (TNFSF13B), (**C**)

1078 TGF- $\beta$ 1, and (**E**) ICAM-1. Statistically significant differences are shown by asterisks (\*,

1079  $p < 0.05$ ; \*\*,  $p < 0.01$ ; \*\*\*,  $p < 0.005$ ). Data are representative of three independent

1080 experiments.

1081

1082 **FIGURE 9. TLR3 regulates the *Chlamydia*-induced expression of matrix**

1083 **metalloproteinases during genital tract infections with *C. trachomatis*.** WT and

1084 TLR3-deficient hOE cells were infected with 10 IFU/ cell with either *C. trachomatis*-L2

1085 (**A-C**) or *C. trachomatis*-serovar D (**D-F**) for up to 72hrs. Supernatants were collected

1086 from individual wells at the time listed for multiplex ELISA analyses to measure the

1087 expression of: (**A, D**) MMP-1, (**B**) MMP-2 (**C, E**) MMP-3, and (**F**) MMP-10. Statistically

1088 significant differences are shown by asterisks (\*,  $p < 0.05$ ; \*\*,  $p < 0.01$ ; \*\*\*,  $p < 0.005$ ). Data

1089 are representative of three independent experiments.

1090

1091 **FIGURE 10. TLR3 plays a role in regulating the *Chlamydia*-induced syntheses of**  
1092 **biomarkers associated with persistence and autoimmunity.** Secreted protein levels  
1093 of (A) sCD163, (B) Chitinase-3-like 1, (C) Osteopontin, and (D) Pentraxin-3 were  
1094 measured in the supernatants of WT and TLR3-deficient hOE cells that were infected  
1095 with *C. trachomatis*-L2 at a MOI 10 IFU/ cell for up to 30hrs. The supernatants were  
1096 collected from individual wells for multiplex ELISA analyses at the listed time point post-  
1097 infection. Statistically significant differences are denoted by asterisks (\*\*\*,  $p<0.001$ ).  
1098 Data are representative of three independent experiments.

1099

1100 **FIGURE 11. TLR3 plays a role in regulating the *Chlamydia*-induced syntheses of**  
1101 **biomarkers associated with iron sequestration, persistence, and autoimmunity**  
1102 **during infection with *C. trachomatis*-serovar D.** WT and TLR3-deficient hOE cells  
1103 were infected with *C. trachomatis*-serovar D at a MOI 10 IFU/ cell for up to 72hrs.  
1104 Supernatants were collected from individual wells at the time listed for multiplex ELISA  
1105 analyses to measure the expression of: (A) sCD163, (B) Lipocalin-2, (C) Osteopontin,  
1106 and (D) Pentraxin-3. Statistically significant differences are shown by asterisks (\*,  
1107  $p<0.05$ ; \*\*\*,  $p<0.005$ ; \*\*\*\*,  $p<0.001$ ). Data are representative of three independent  
1108 experiments.

1109

1110 **Figure 12. TLR3 deficiency in murine OE cells leads to larger and aberrantly**  
1111 **shaped chlamydial inclusions.** hOE-WT cells (A and B) and hOE-TLR3KO cells (C  
1112 and D) were either mock treated or infected with *C. trachomatis*-serovar D at a MOI of

1113 10 IFU/ cell for 36hrs. The chlamydial inclusion was stained using anti-chlamydial LPS  
1114 monoclonal antibody and detected via Alexa-fluor 488 conjugated secondary antibody.  
1115 Nuclei were visualized via DAPI staining (panels B and D). *Data shown are*  
1116 *representative. Arrows show smaller vs. larger inclusion; magnification 60x.*

1117

1118 **FIGURE 13. LPS levels within the chlamydial inclusions of infected WT and TLR3-**  
1119 **deficient hOE cells.** hOE-WT and hOE-TLR3KO cells were either mock treated or  
1120 infected with *C. trachomatis*-L2 (in triplicate) at MOI of 5 IFU/ cell for 72hrs. *Chlamydia*  
1121 LPS levels were determined in multispectral flow cytometric analyses of hOE cells  
1122 stained using anti-*Chlamydia* LPS monoclonal antibody and allophycocyanin (APC)  
1123 conjugated secondary antibody. APC-conjugated anti-IgG served as an isotype staining  
1124 control. 10000 cells/events were processed in flow cytometry analysis.  $\Delta$ MFI,  $\Delta$   
1125 Geometric Mean Fluorescent Intensity. Data shown are representative of three  
1126 independent experiments. Statistically significant differences are shown by asterisks (\*\*,  
1127  $p < 0.01$ ).

1128

1129 **FIGURE 14. Measuring chlamydial replication in infected WT and TLR3-deficient**  
1130 **hOE cells.** hOE-WT and hOE-TLR3KO cells were either mock treated or infected with  
1131 *C. trachomatis*-serovar D (in triplicate) at MOI of 5 IFU/ cell for 72hrs. The cells were  
1132 disrupted in SPG buffer at the indicated time points as described in Materials and  
1133 Methods and lysates were collected, sonicated, and titered on fresh Hela cell  
1134 monolayers. The data presented are representative of three different experiments.

1135 Statistically significant differences are shown by asterisks (\*\*\*,  $p < 0.005$ ; \*\*\*\*,  $p < 0.001$ ).

1136 IFU, inclusion forming units.

1137

1138

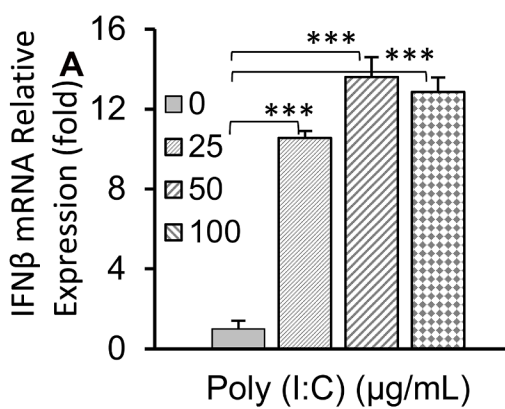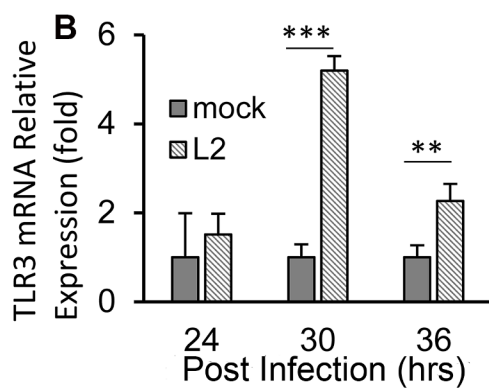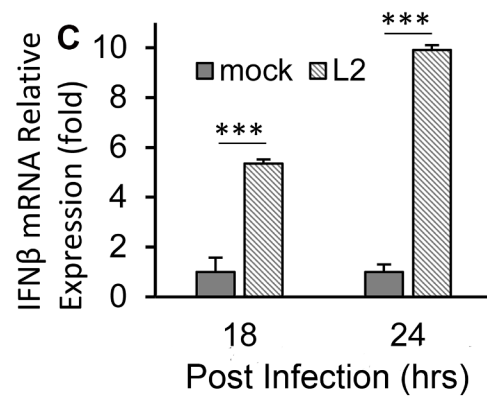



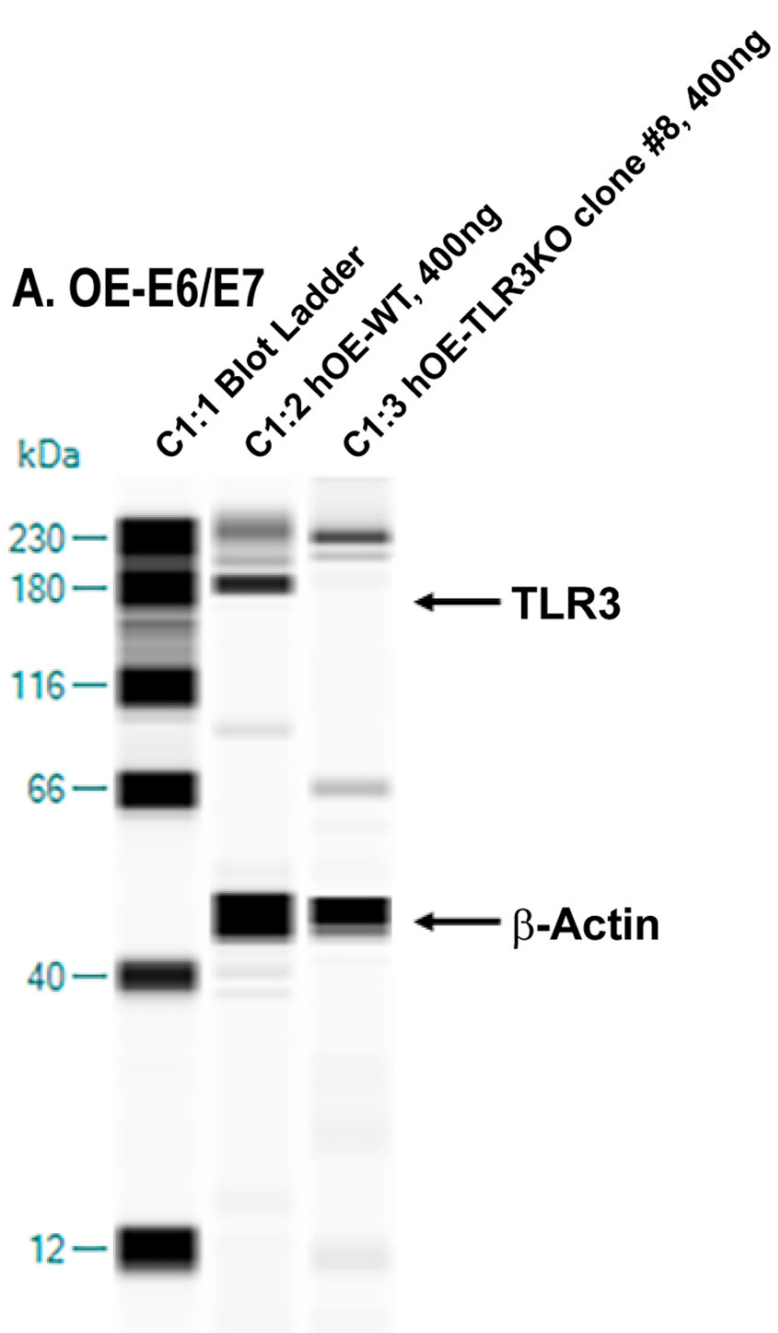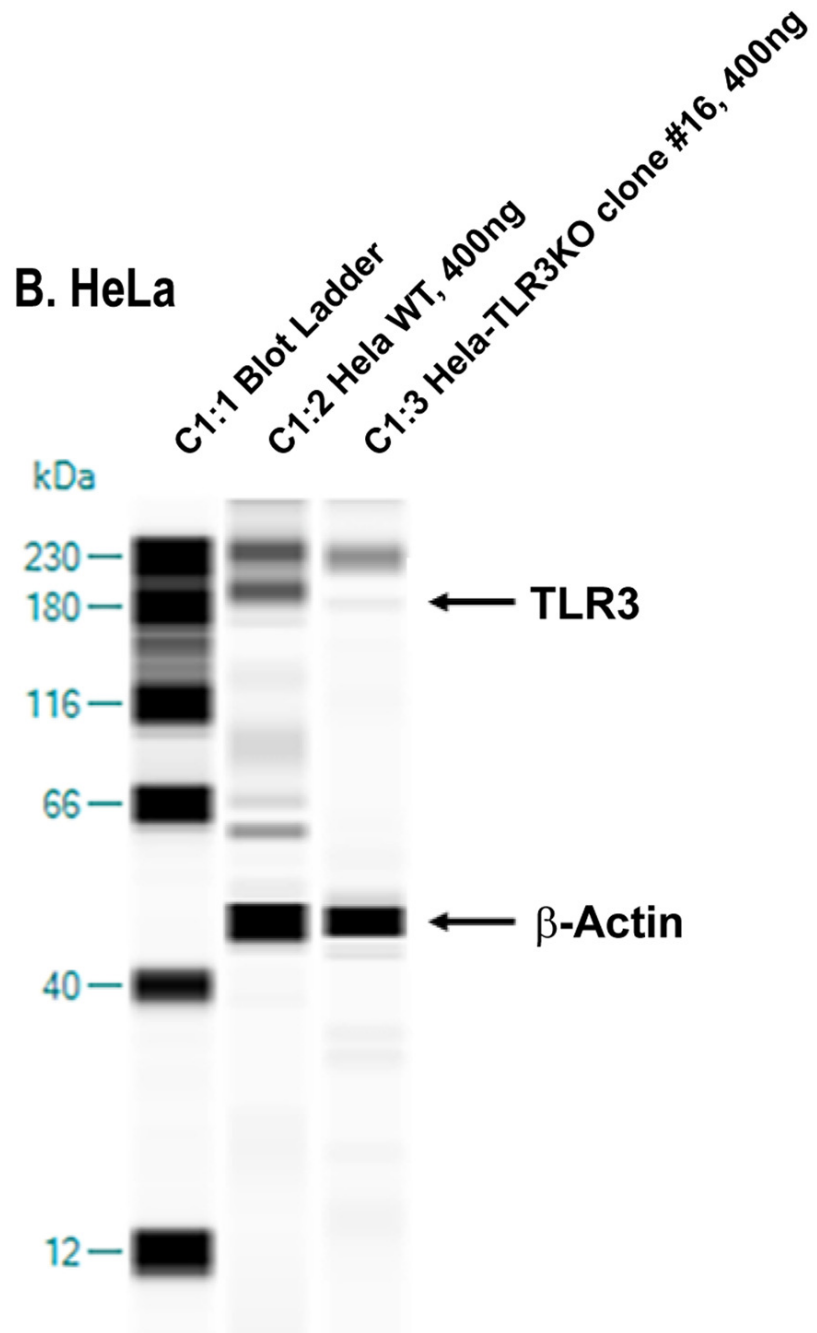

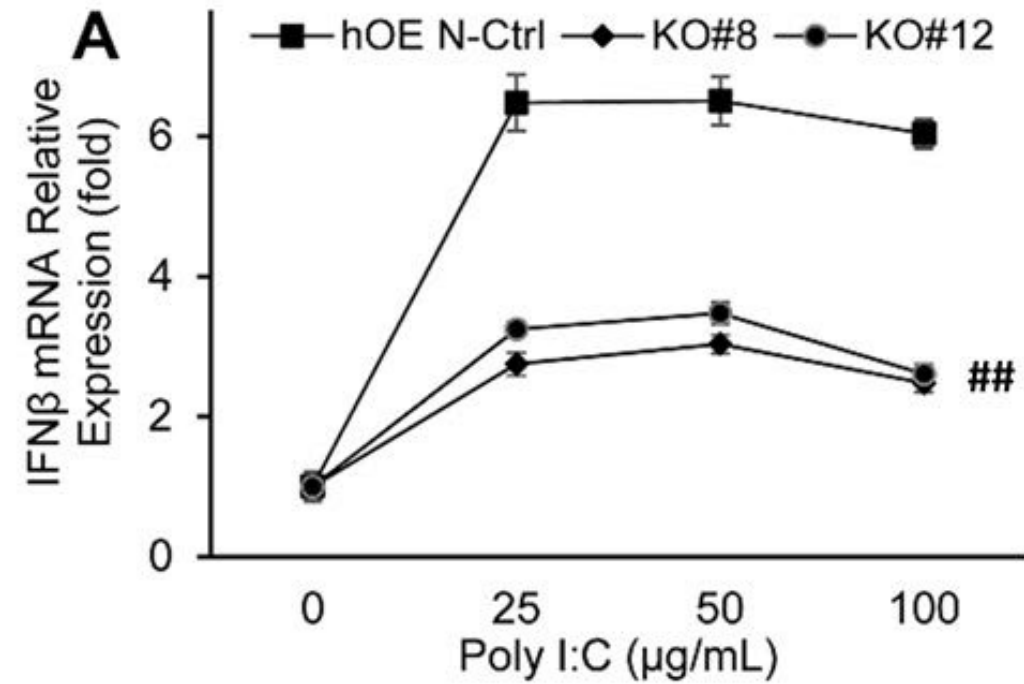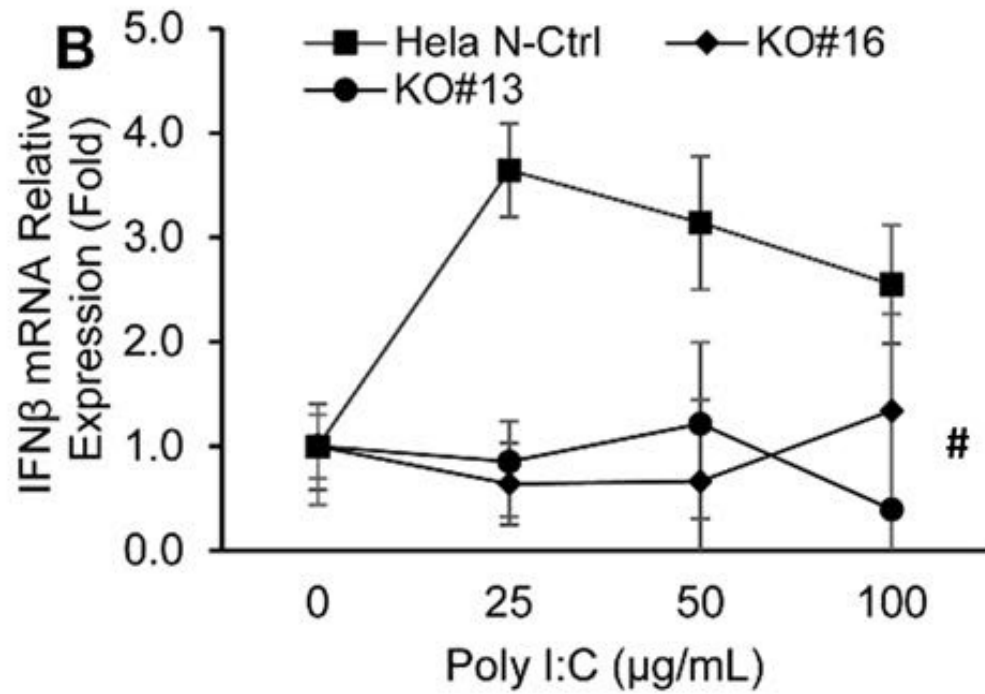

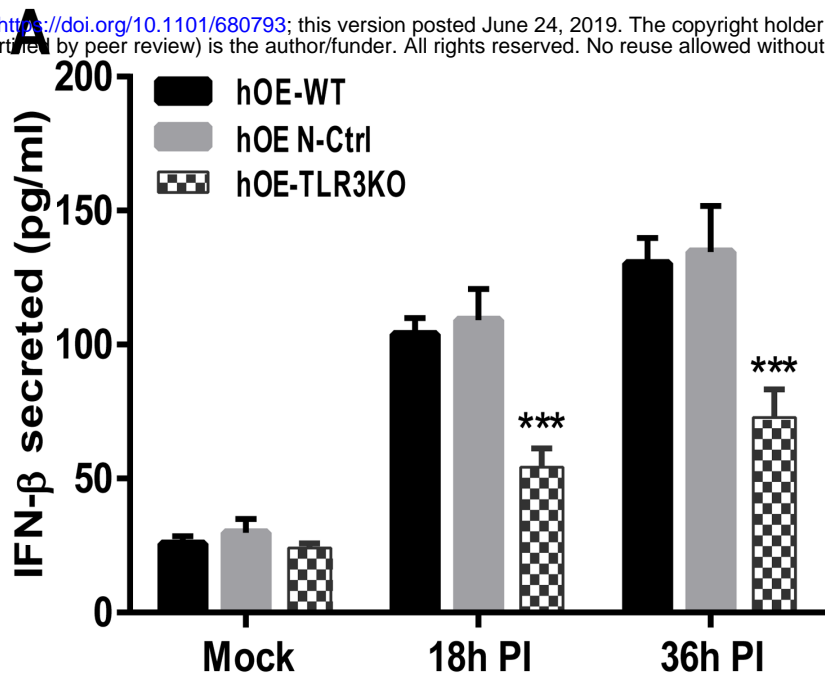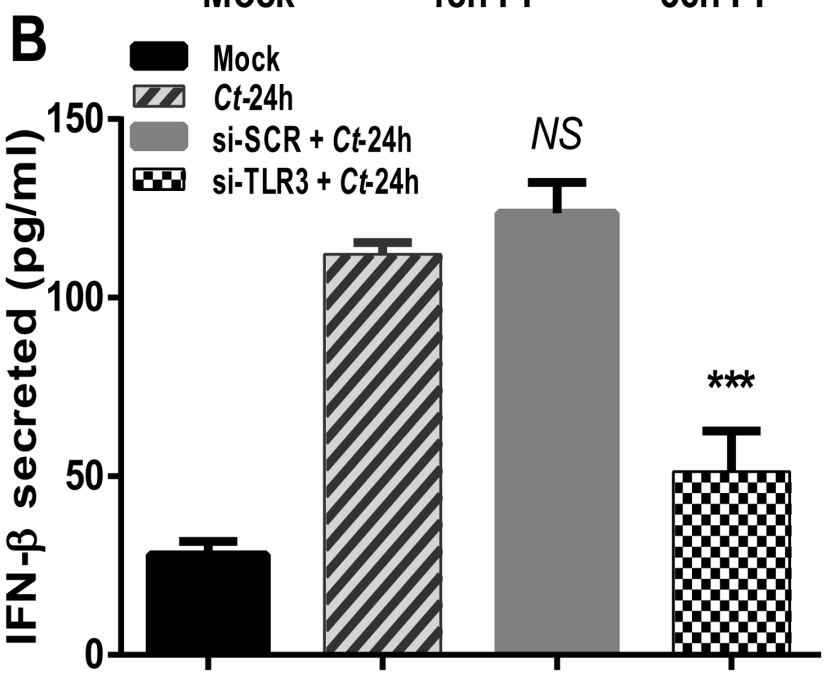

**C** hOE-E6/E7 Cells

CLUSTAL O(1.2.4) multiple sequence alignment

```

HOE-E6/E7-WT-Exon2      ATGAGACAGACTTTGCCTTGTATCTACTTTTGGGGGGCCTTTTGCCCTTTGGGATGCTG      60
HOE-E6/E7-shTLR3-Exon2  ATGAGACAGACTTTGCCTTGTATCTACTTTTGGGGGGCCTTTTGCCCTTTGGGATGCTG      60
*****

HOE-E6/E7-WT-Exon2      TGTGCATCCTCCACCACCAAGTGCAGTGTAGCCATGAAGTTGCTGACTGCAGCCACCTG      120
HOE-E6/E7-shTLR3-Exon2  TGTGCATCCTCCCCACACAAGCGACCGTTAGCACGAAGCCGTCTACCGAGCACCCGAAG      120
*****

HOE-E6/E7-WT-Exon2      AAGTTGACTCAGGTACCCGAT----      141
HOE-E6/E7-shTLR3-Exon2  CCG----ACCAGGTACCATGATCA      141

```

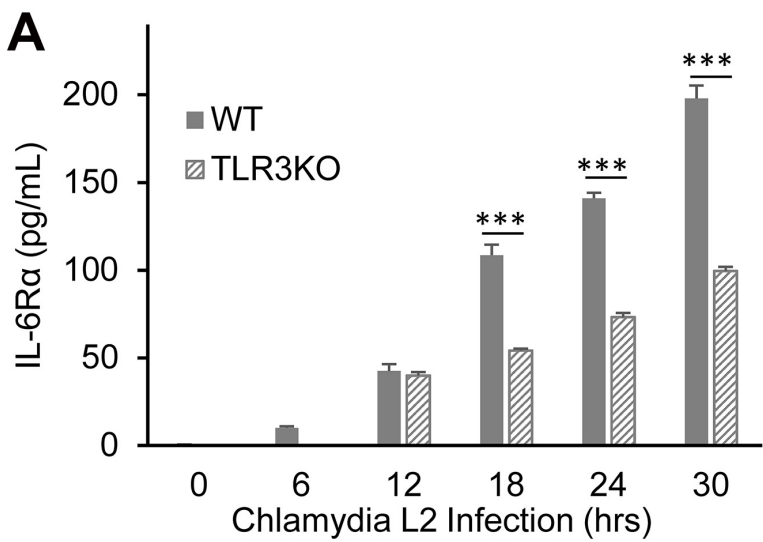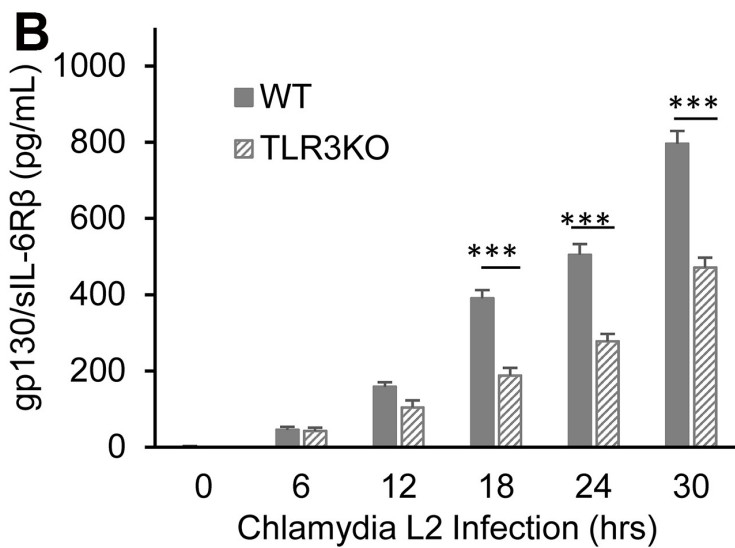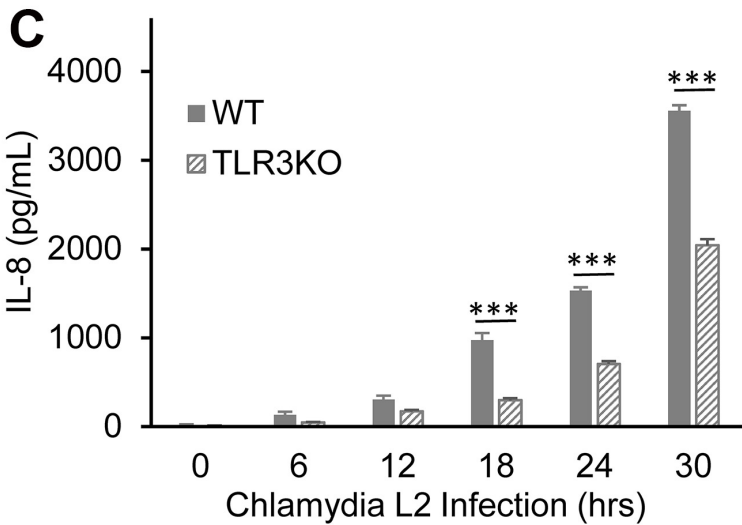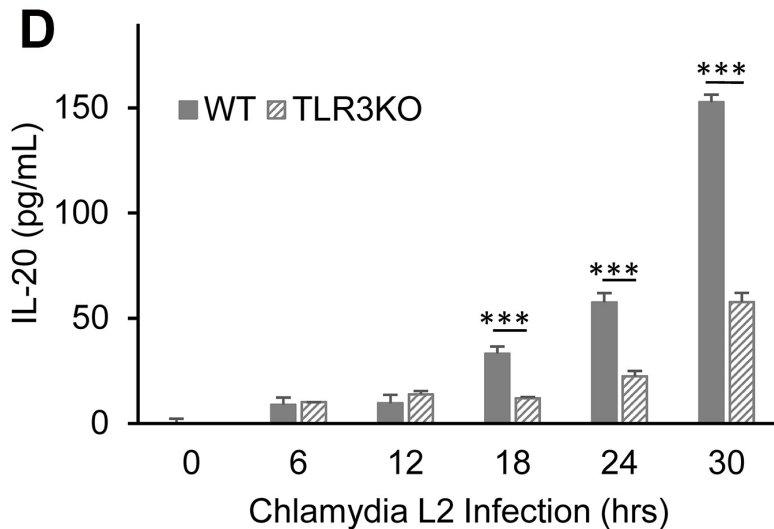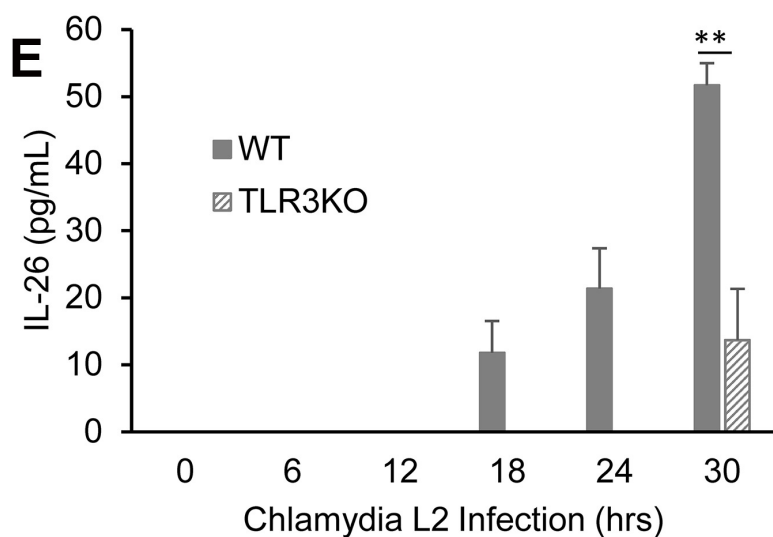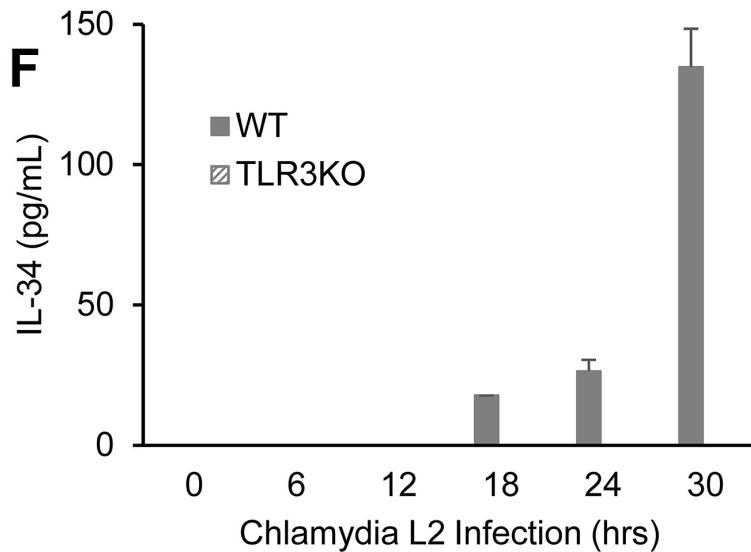

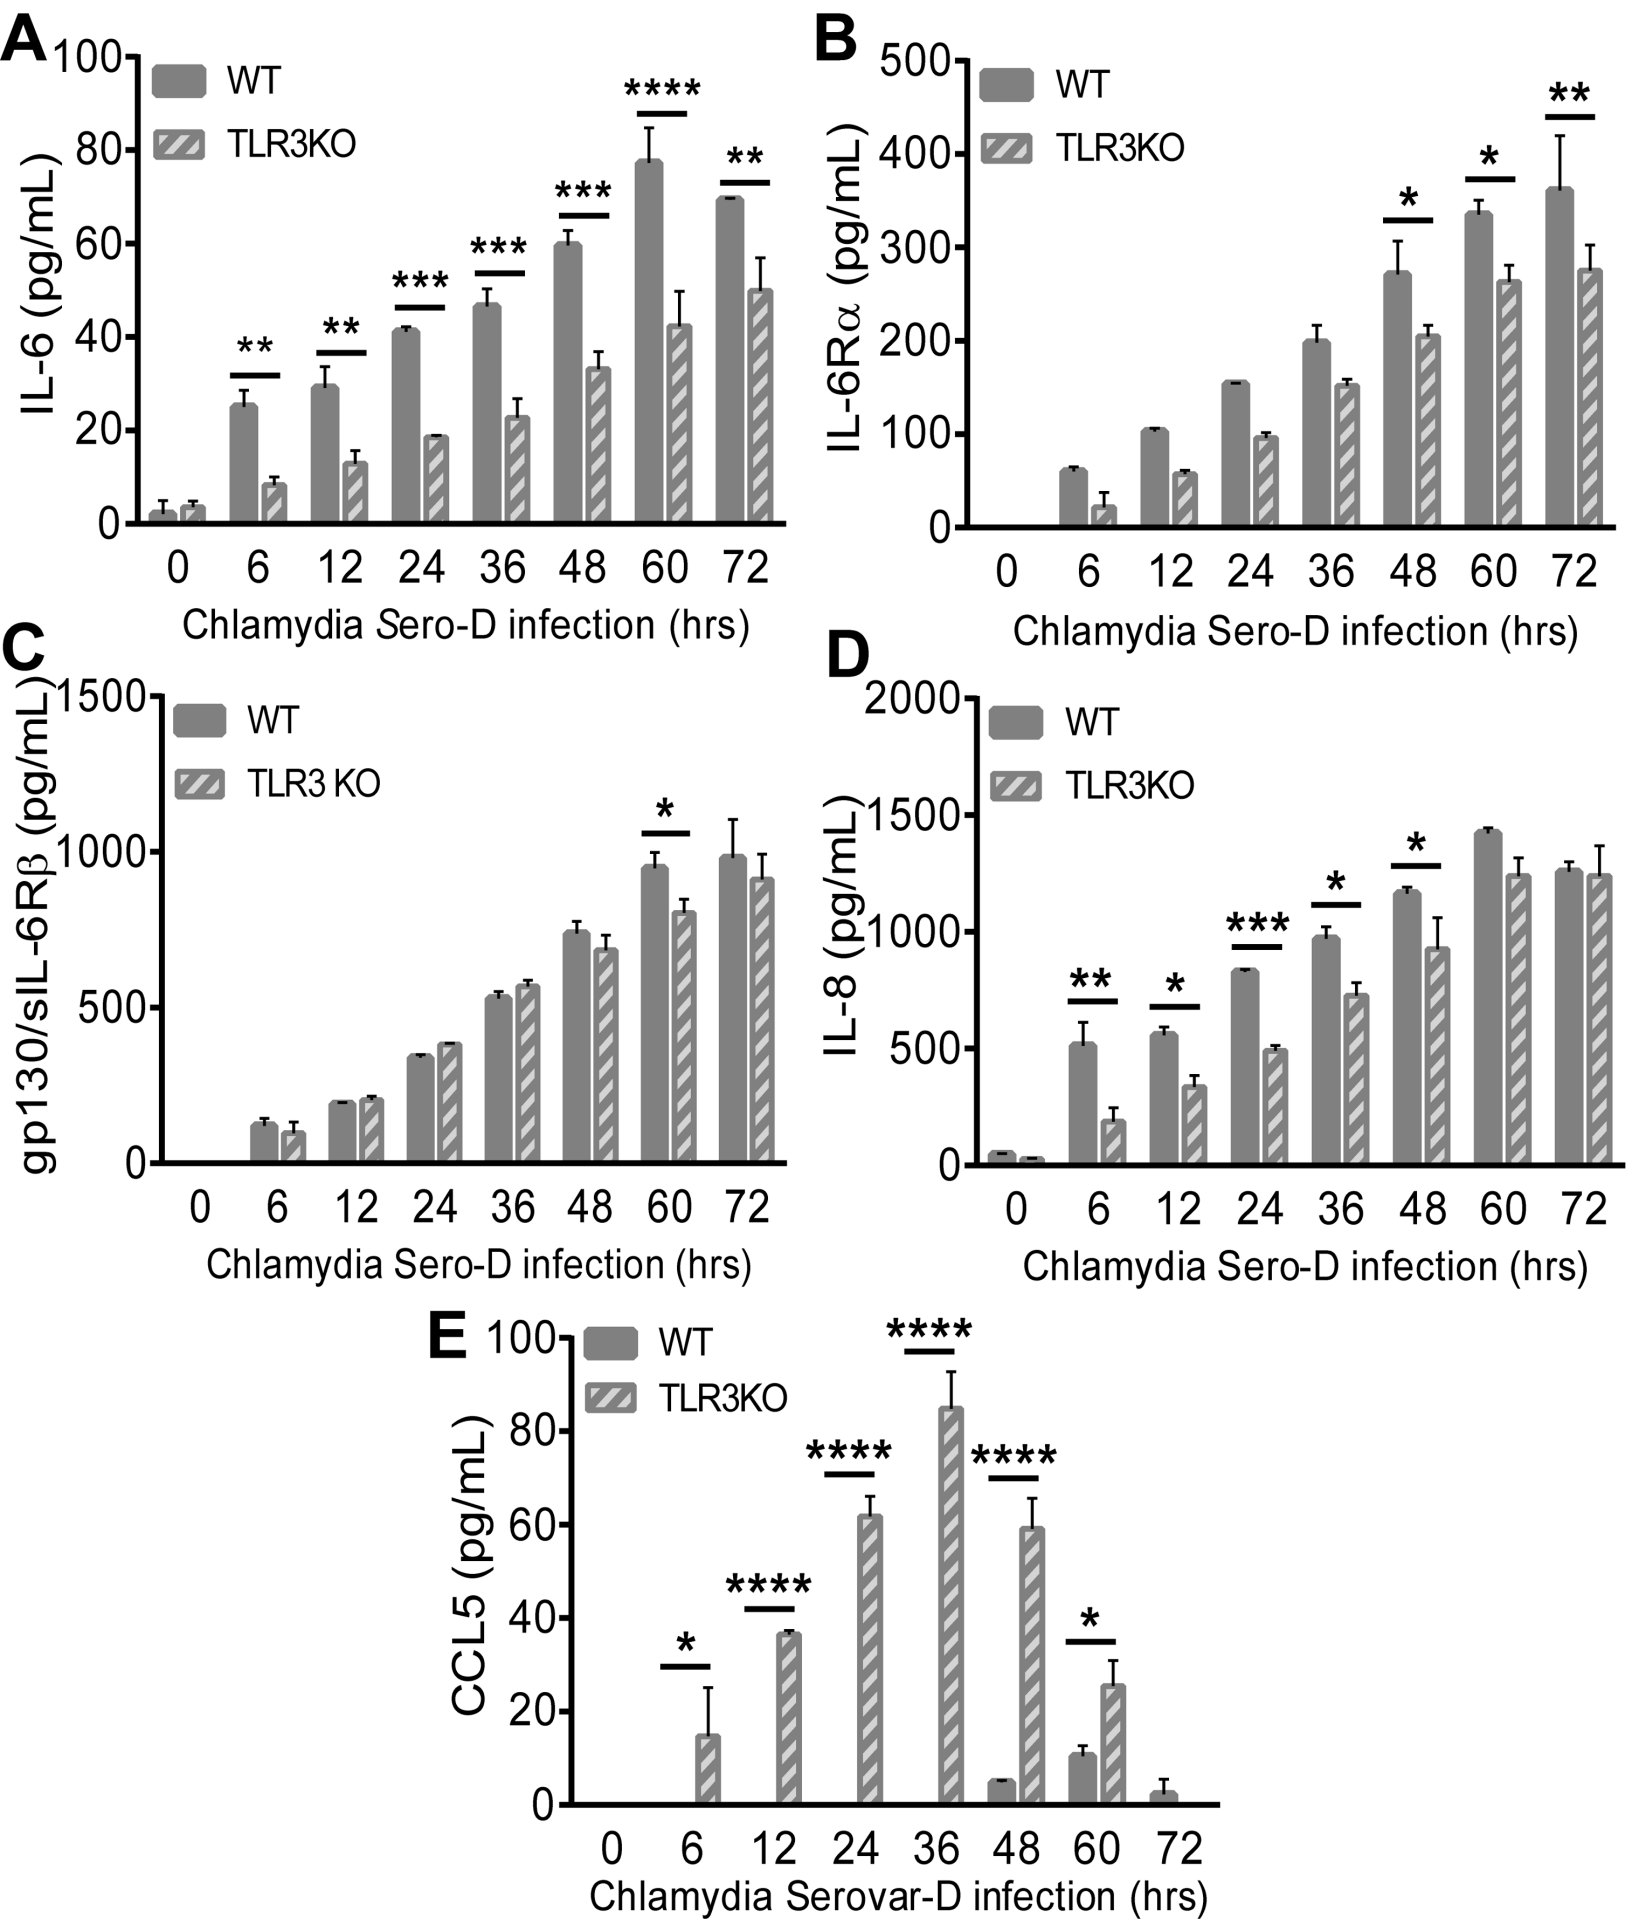

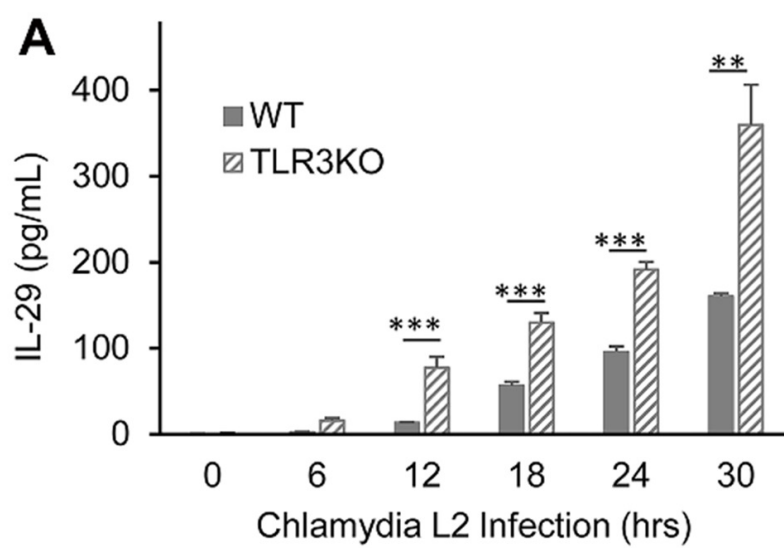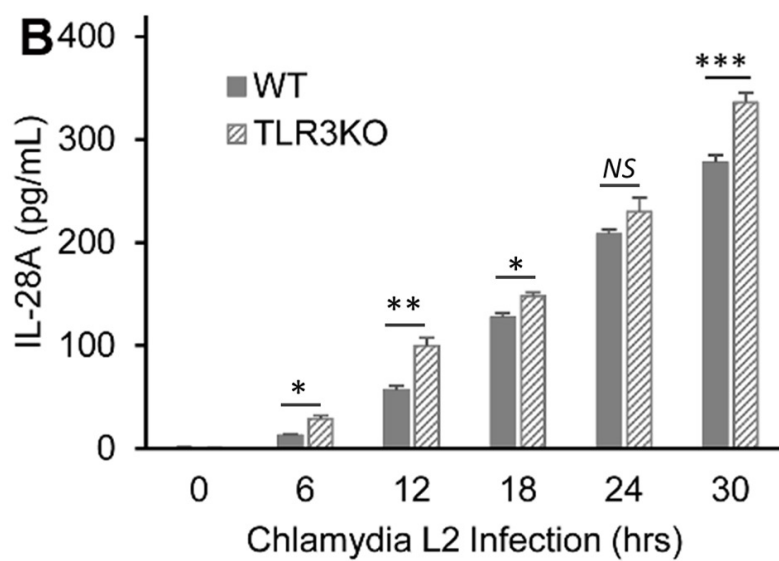

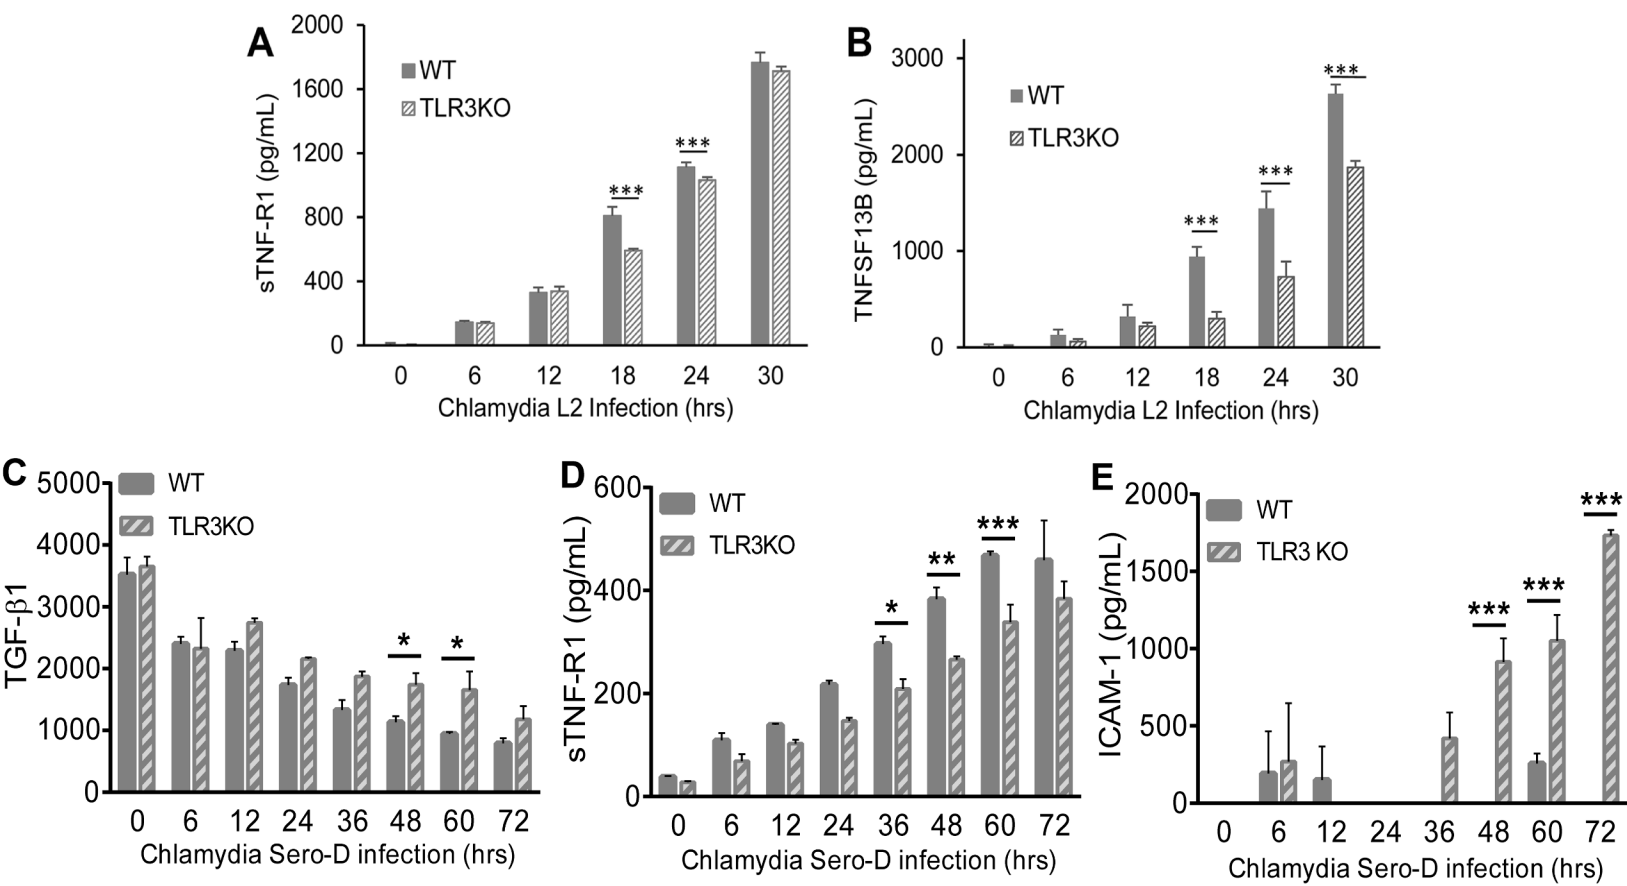

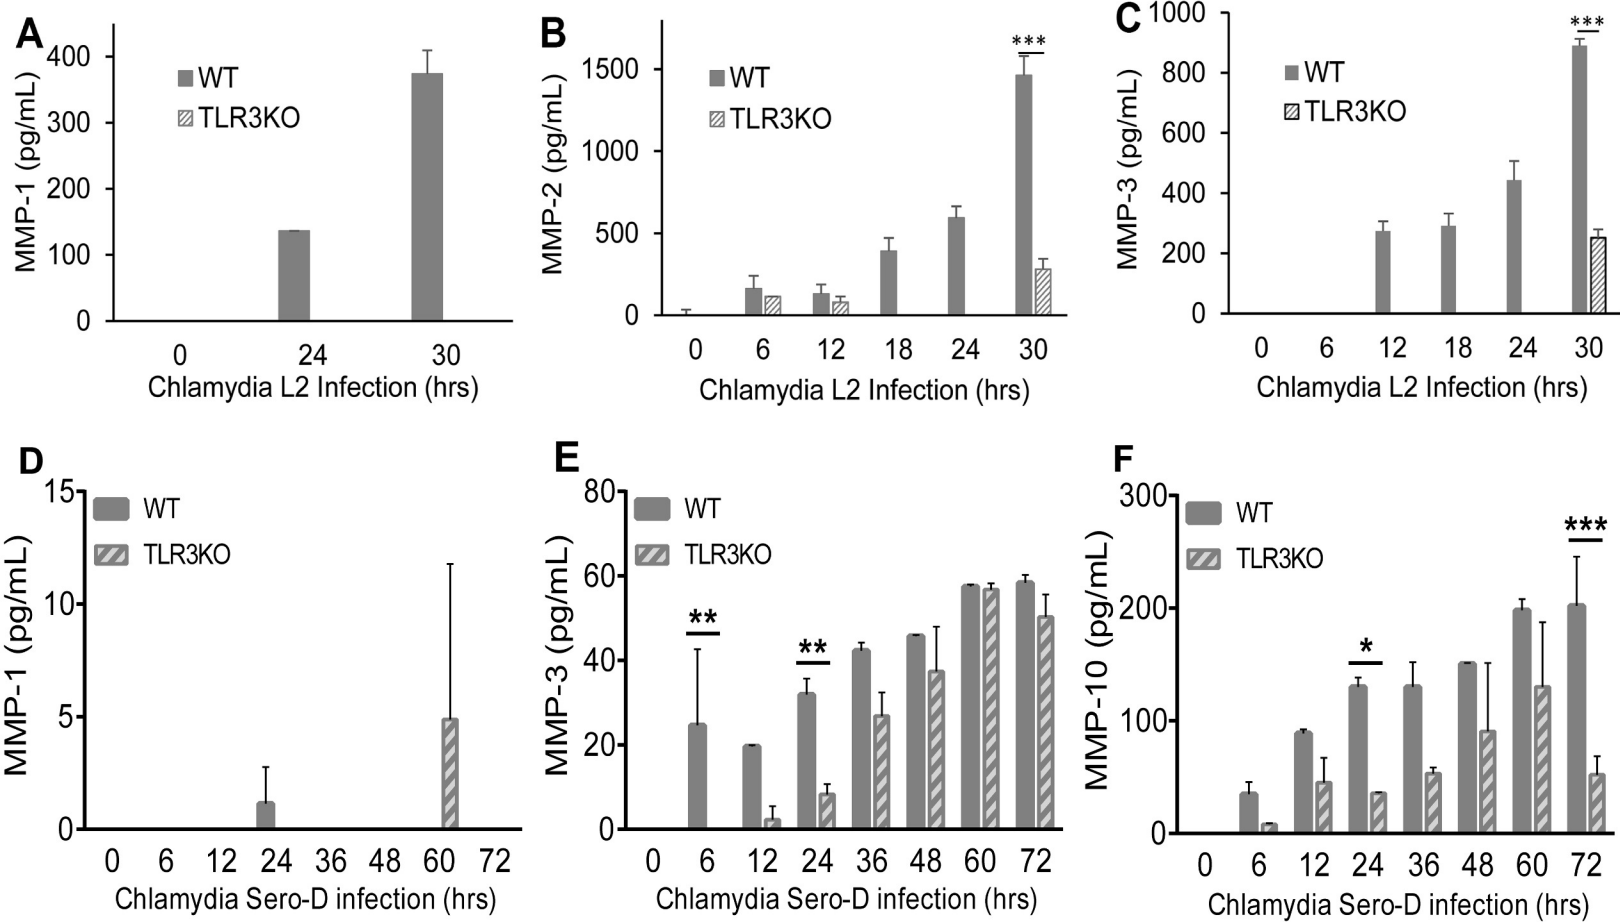



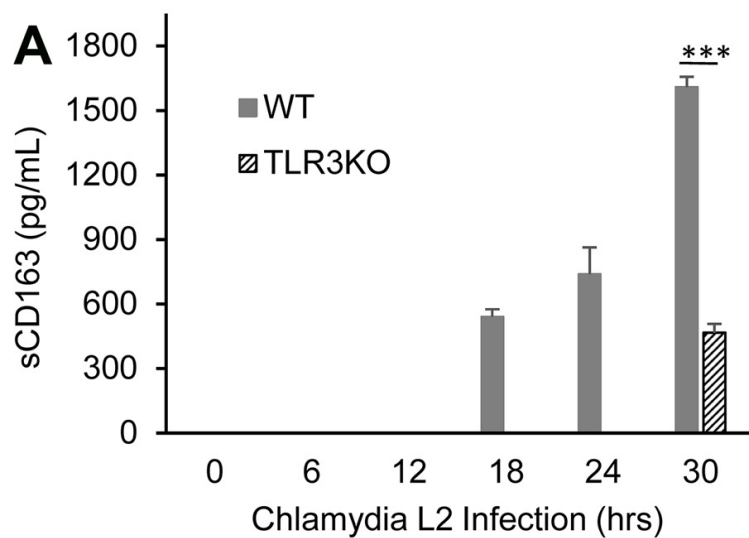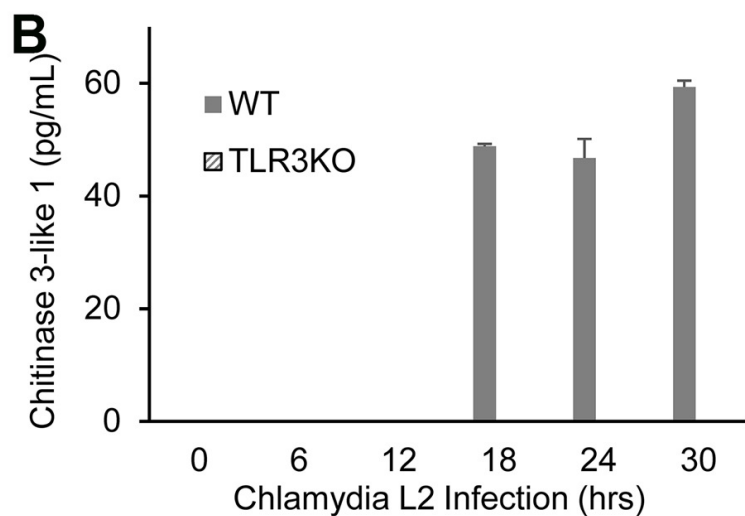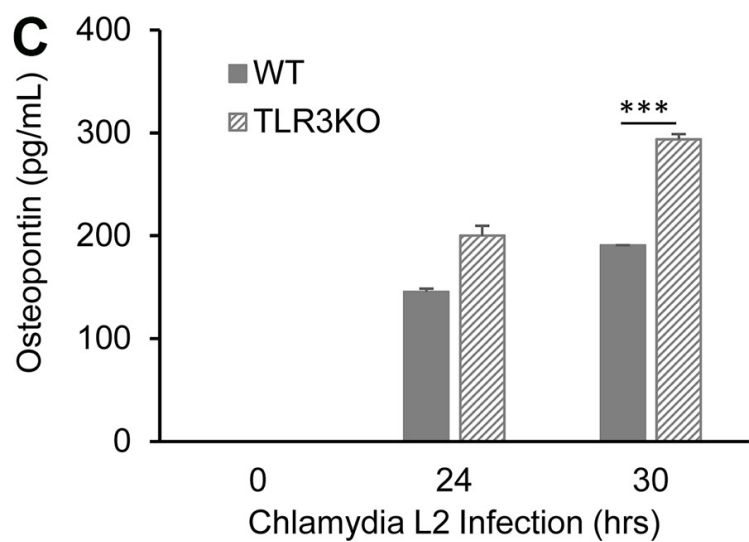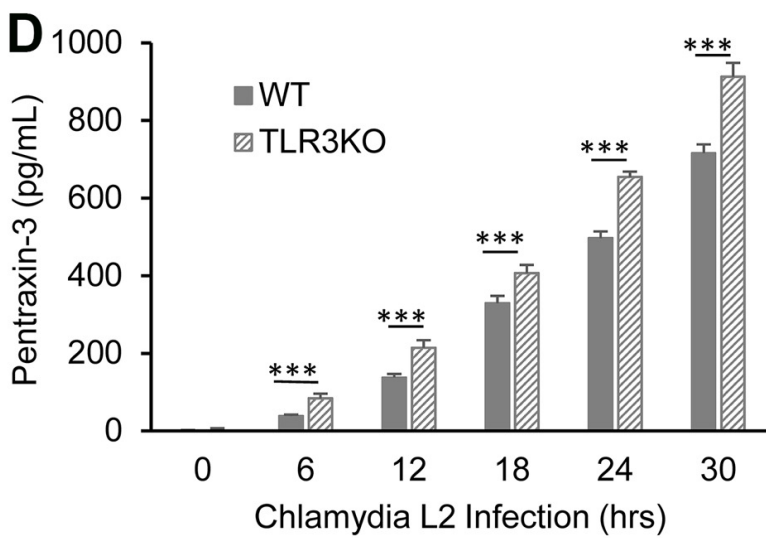

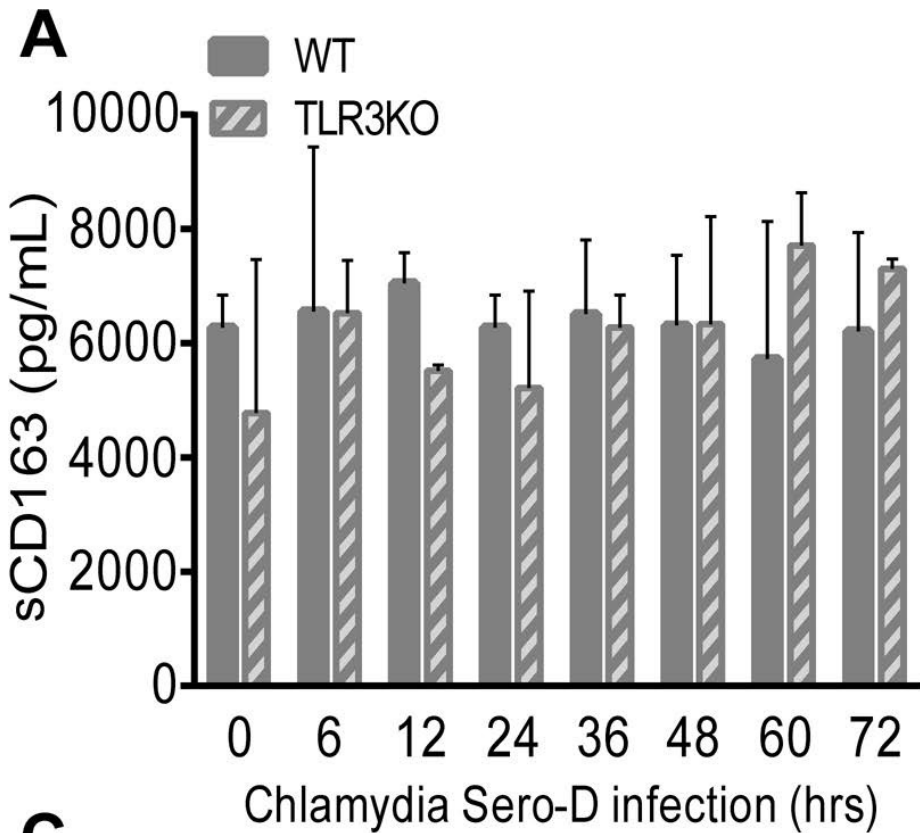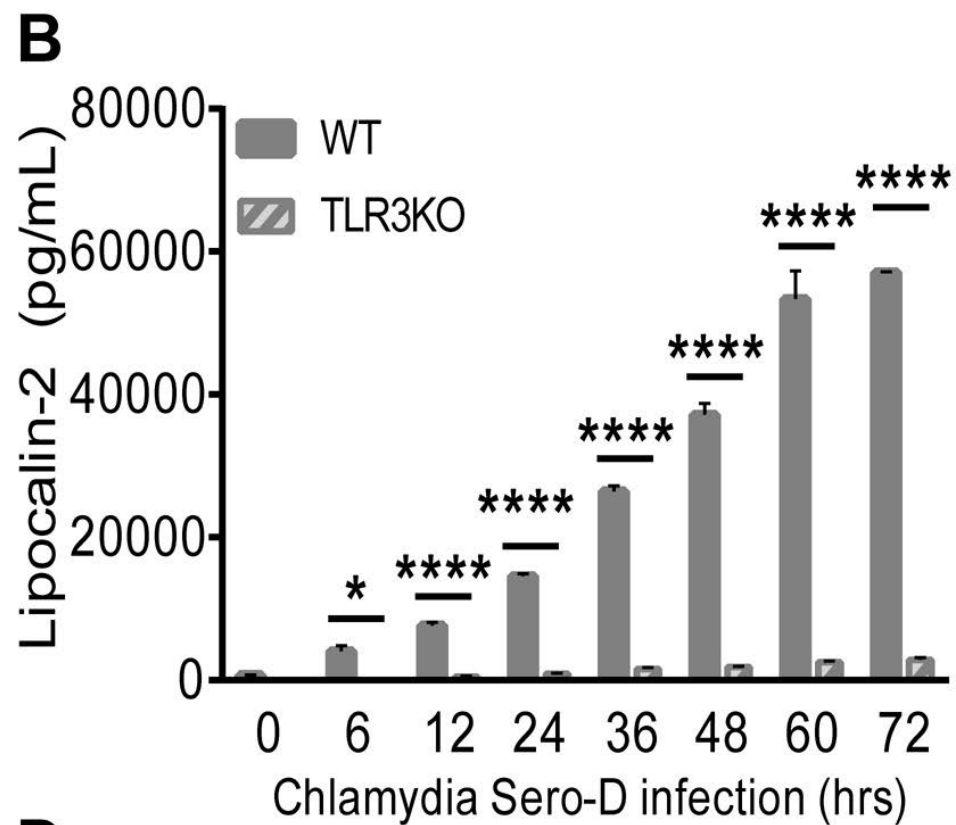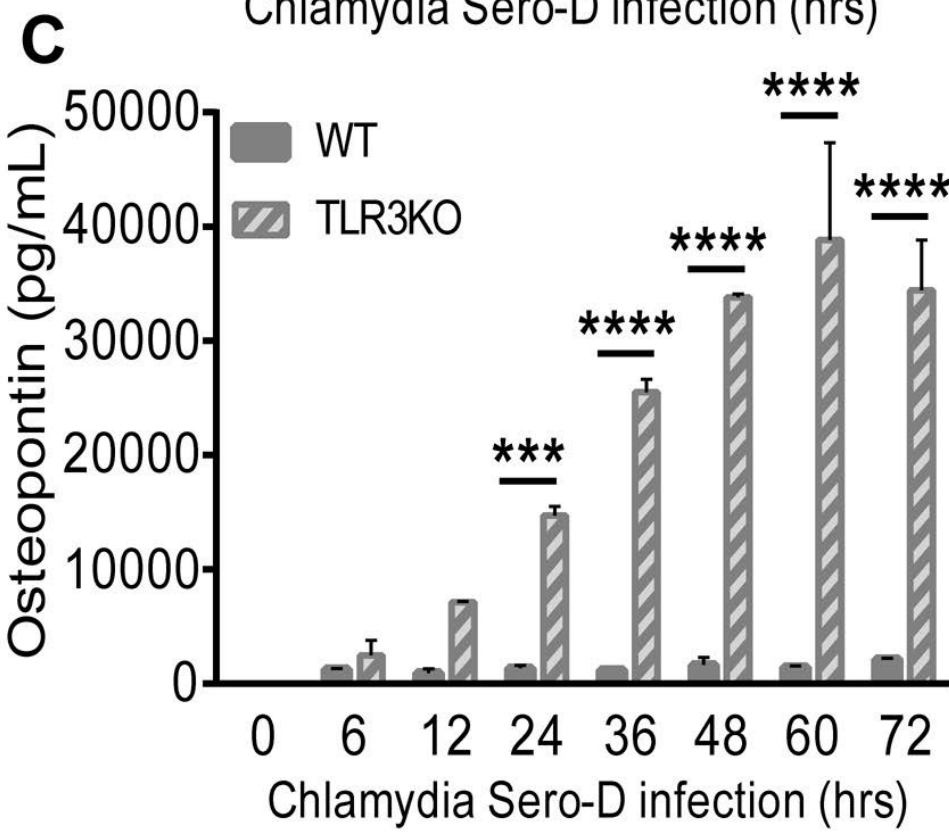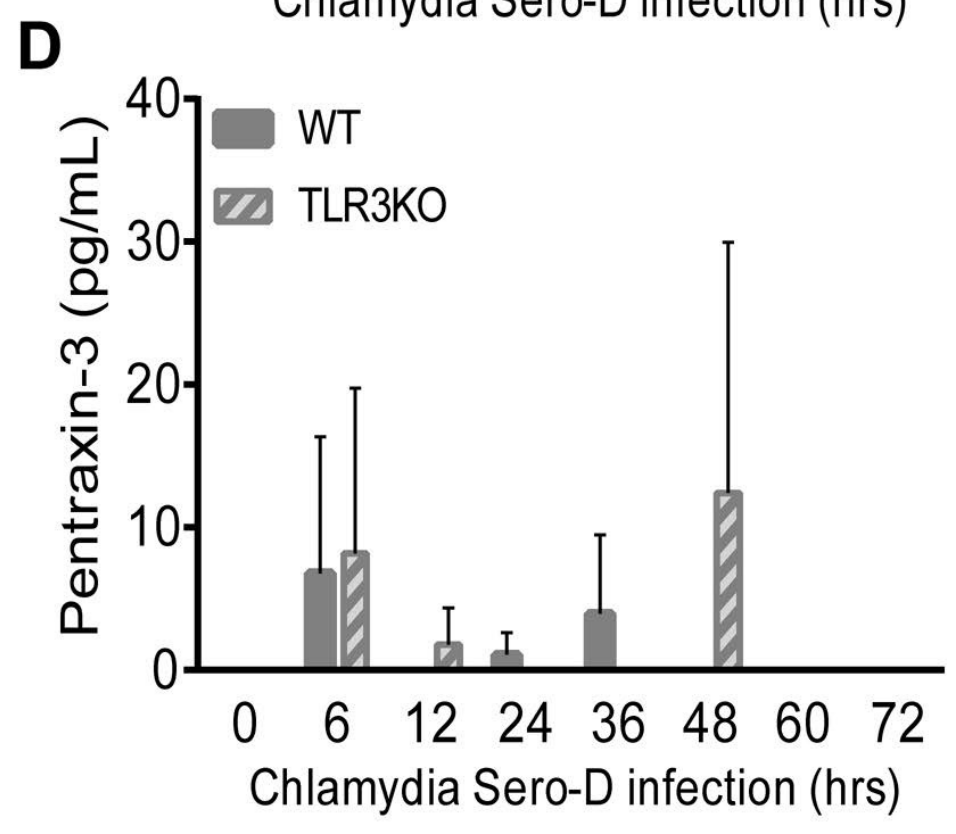

hOE-WT

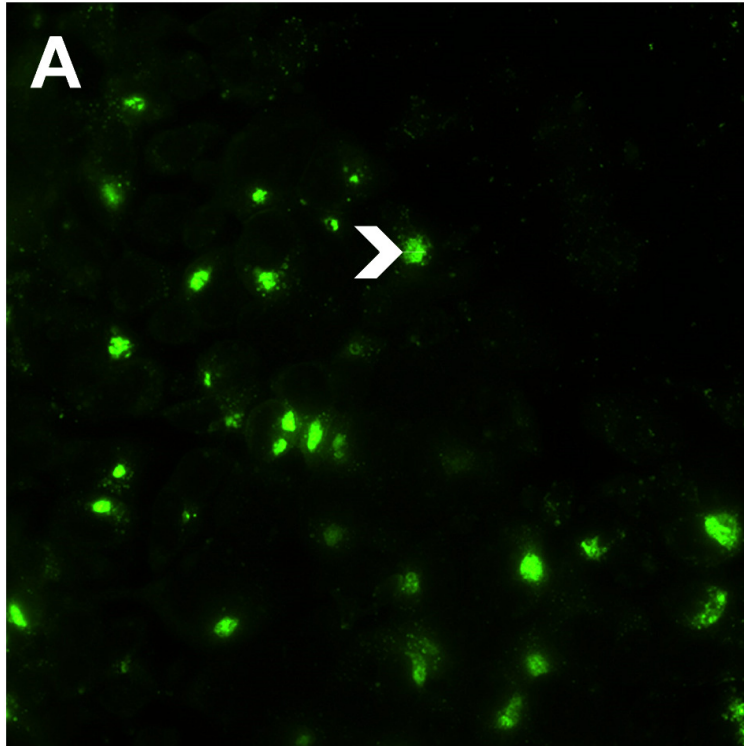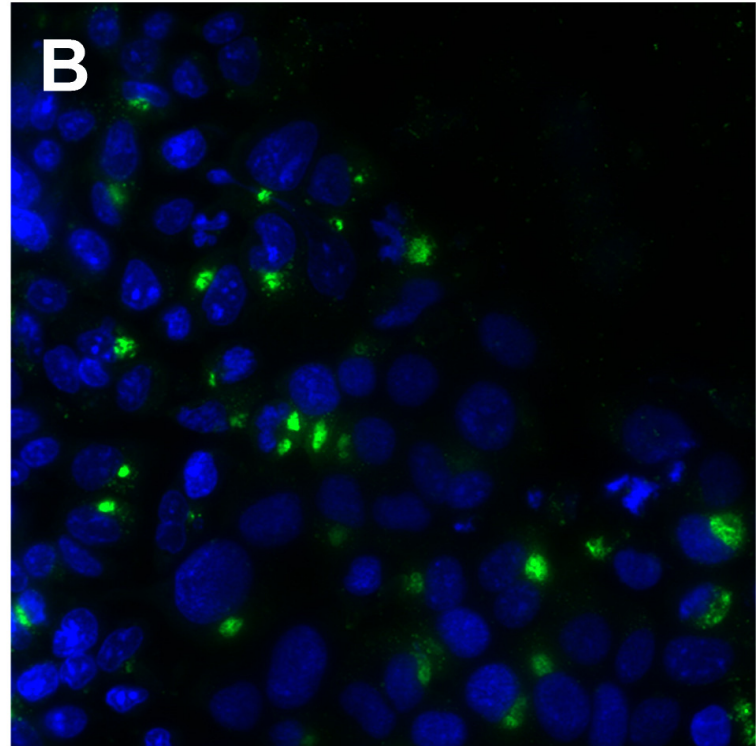

hOE-TLR3(-)

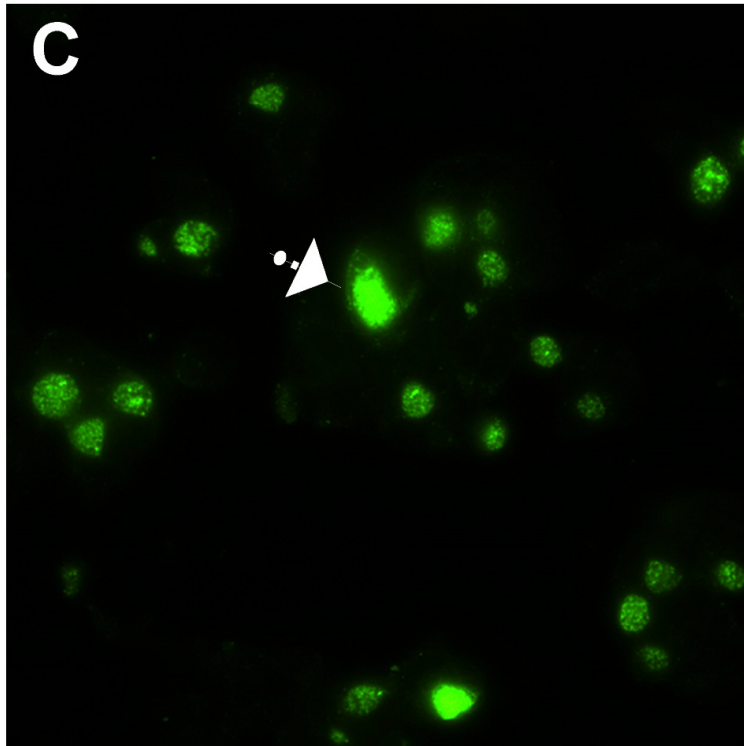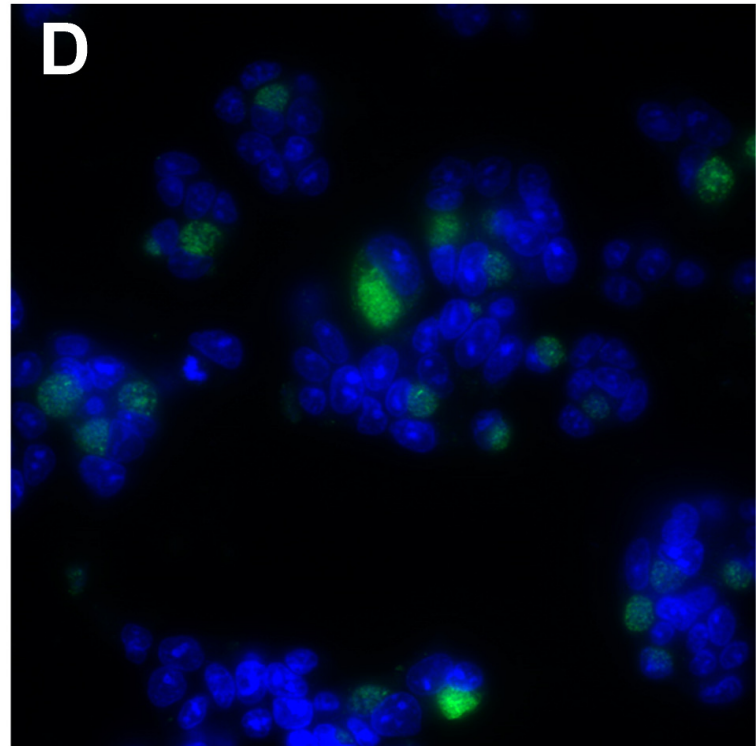

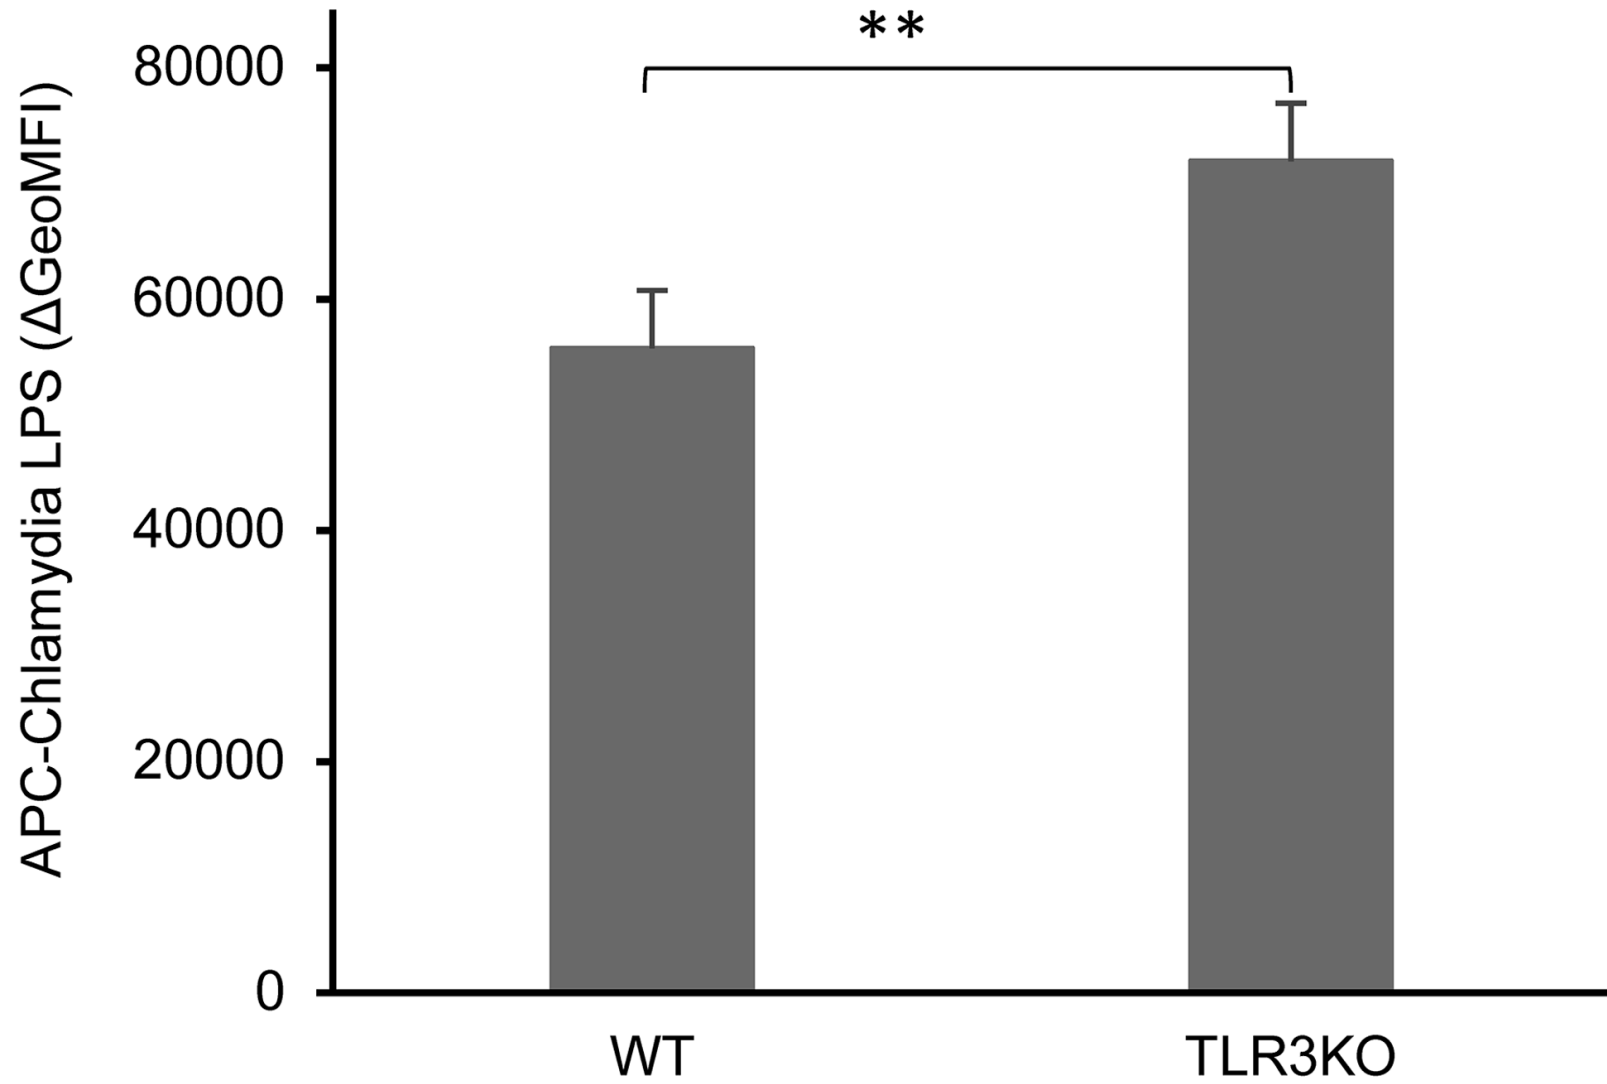

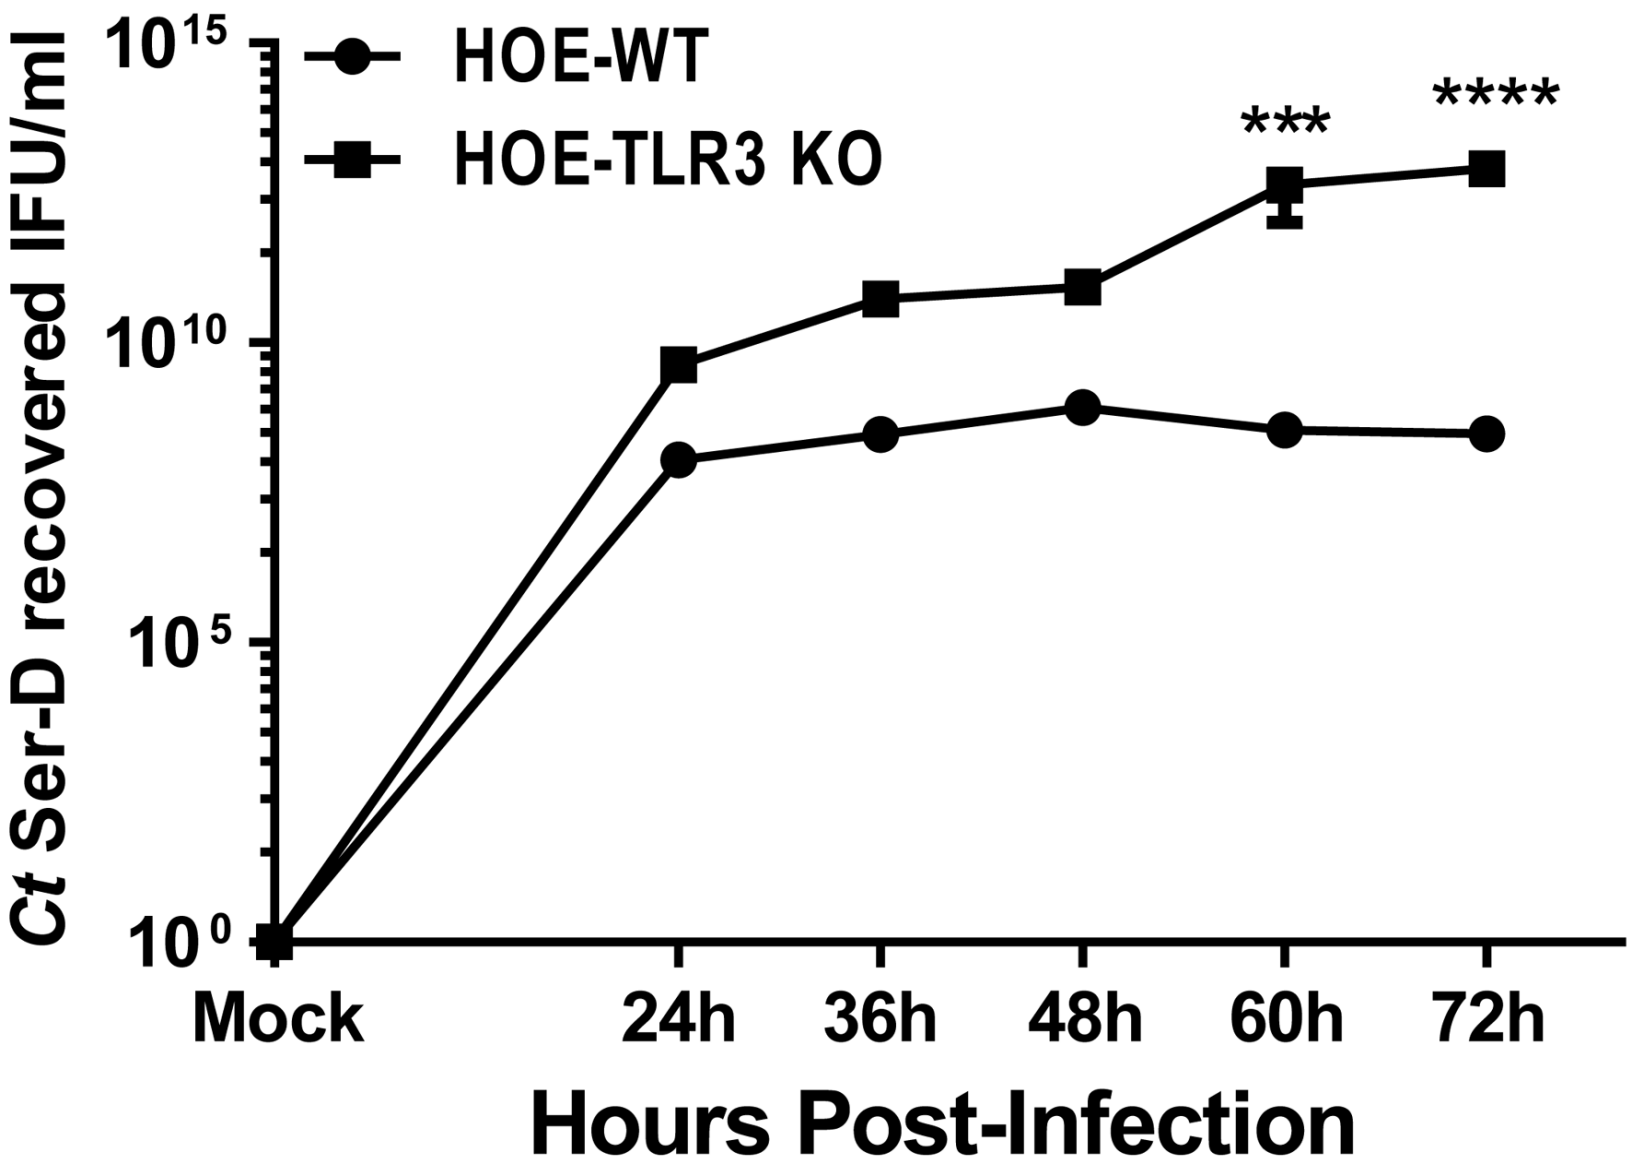

Source: https://biorxiv.org/content/biorxiv/early/2019/06/24/680793.full-text.pdf
